# Supplementary material
Source: Royal Society of Chemistry journal article supplement (doi:10.1039/d6ma00724d)
Supplement: d6ma00724d1.pdf [file d6ma00724d1.pdf]

## SUPPLEMENTARY INFORMATION

### **Deciphering Divergent Ferroelectric Behaviour in Hydrogen-bonded Organic Polymorphs**

*Yogita Gupta,<sup>a</sup> Sanjay Dutta,<sup>a</sup> Biswajit Mohanty,<sup>a</sup> Alison J. Edwards,<sup>b</sup> Vijay Kumar,<sup>a,c</sup> and Parthapratim Munshi<sup>a,\*</sup>*

<sup>a</sup>Department of Chemistry, School of Natural Science, Shiv Nadar Institution of Eminence (Deemed to be University), Tehsil Dadri, Uttar Pradesh- 201314, India.

<sup>b</sup>Australian Centre for Neutron Scattering, ANSTO, Lucas Heights, NSW 2234, Australia.

<sup>c</sup>Dr. Vijay Kumar Foundation, 1969 Sector 4, Gurgaon, Haryana 122001, India

E-mail: [parthapratim.munshi@snu.edu.in](mailto:parthapratim.munshi@snu.edu.in)

**Table S1:** Crystal structure and refinement details for the neutron diffraction data of 1P\_T form.

| Parameters                                     | 1P_T                                                                                                    |
|------------------------------------------------|---------------------------------------------------------------------------------------------------------|
| Chemical Formula                               | C <sub>22</sub> H <sub>13</sub> F <sub>3</sub> N <sub>2</sub>                                           |
| Formula weight                                 | 362.34                                                                                                  |
| Space group                                    | <i>P</i> 4 <sub>1</sub>                                                                                 |
| Temperature (K)                                | 100.0 (2)                                                                                               |
| <i>a</i> = <i>b</i> , <i>c</i> (Å)             | 14.4058(5), 15.8555(6)                                                                                  |
| Volume (Å <sup>3</sup> )                       | 3290.4(3)                                                                                               |
| $\rho$ (g cm <sup>-3</sup> )                   | 1.463                                                                                                   |
| <i>Z</i>                                       | 8                                                                                                       |
| <i>F</i> (000)                                 | 1104.0                                                                                                  |
| Crystal size (mm <sup>3</sup> )                | 1.2 × 1.0 × 0.5                                                                                         |
| Instrument                                     | KOALA2 @ end of guide position on TG3-supermirror guide at OPAL reactor at ANSTO                        |
| Radiation                                      | “white” neutron beam (integrated from $\lambda = 0.80 - 1.60$ Å) to minimum $d_{\text{space}} = 0.55$ Å |
| 2 $\theta$ range for data collection (°)       | 4.5 to 180                                                                                              |
| Index (h k l) ranges                           | -25 ≤ h ≤ 26, -25 ≤ k ≤ 25, -28 ≤ l ≤ 28                                                                |
| Measured reflections                           | 134826                                                                                                  |
| Independent reflections                        | 8632 [ $R_{\text{int}} = 6.1(5.6)$ for 36751 data at 4 $\sigma$ ]                                       |
| Data/Restraints/Parameters                     | 4735/1/721                                                                                              |
| Goodness-of-fit on $F^2$                       | 0.805                                                                                                   |
| Final <i>R</i> indices [ $I \geq 2\sigma(I)$ ] | $R_1 = 0.0623$ , $wR_2 = 0.0261$                                                                        |
| Final <i>R</i> indices [all data]              | $R_1 = 0.0505$ , $wR_2 = 0.0246$                                                                        |

**Table S2:** Comparison of N-H bond lengths and N-H...N distances (in Å) obtained from reported average neutron distances, HAR model, and Neutron diffraction data for 1P\_T (first row) and 1P\_O (second row) form, respectively.

| Method               | Neutron Experiment | Average Neutron | HAR   |
|----------------------|--------------------|-----------------|-------|
| <b>N1A-H1A</b>       | 1.034 (3)          | 1.030           | 0.977 |
|                      | 1.034 (3)          | 1.030           | 1.018 |
| <b>N1B-H1B</b>       | 1.039 (3)          | 1.030           | 0.984 |
|                      | 1.039 (3)          | 1.030           | 1.005 |
| <b>N1A-H1A...N2B</b> | 1.852 (3)          | 1.856           | 1.906 |
|                      | 1.785 (3)          | 1.789           | 1.799 |
| <b>N1B-H1B...N2A</b> | 1.899 (3)          | 1.909           | 1.955 |
|                      | 1.946 (3)          | 1.955           | 1.974 |

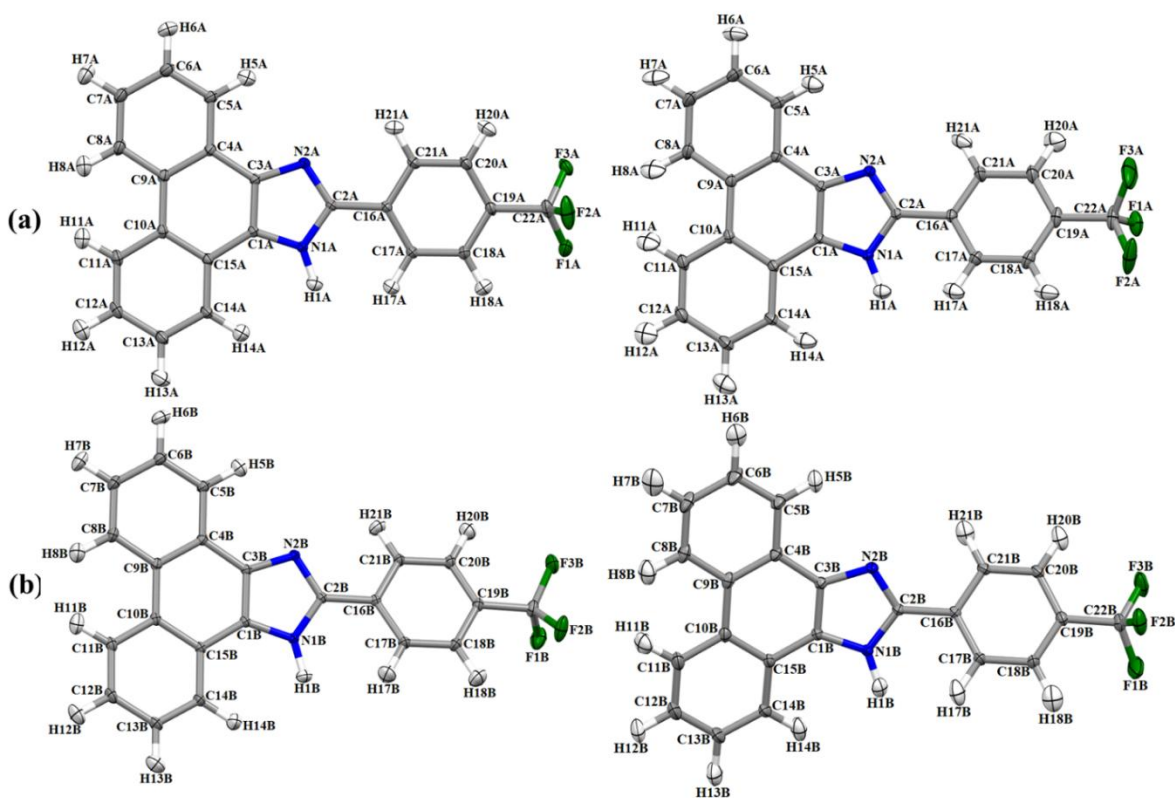

**Figure S1:** The ORTEP diagram is drawn at 50% ellipsoid probability for all atoms for (a) molecule A and (b) molecule B for 1P\_T (left) and 1P\_O (right) form.

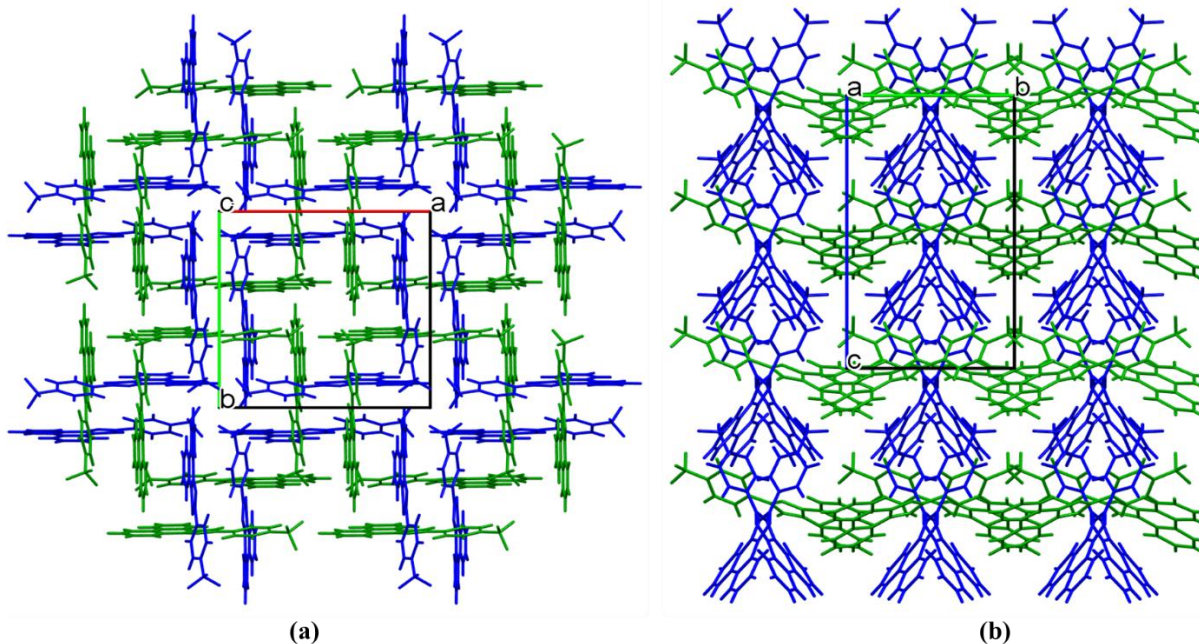

**Figure S2:** Molecular packing diagrams highlighting the butterfly-like arrangements in (A) 1P\_T viewed down the  $c$ -axis and (B) 1P\_O viewed down the  $a$ -axis.

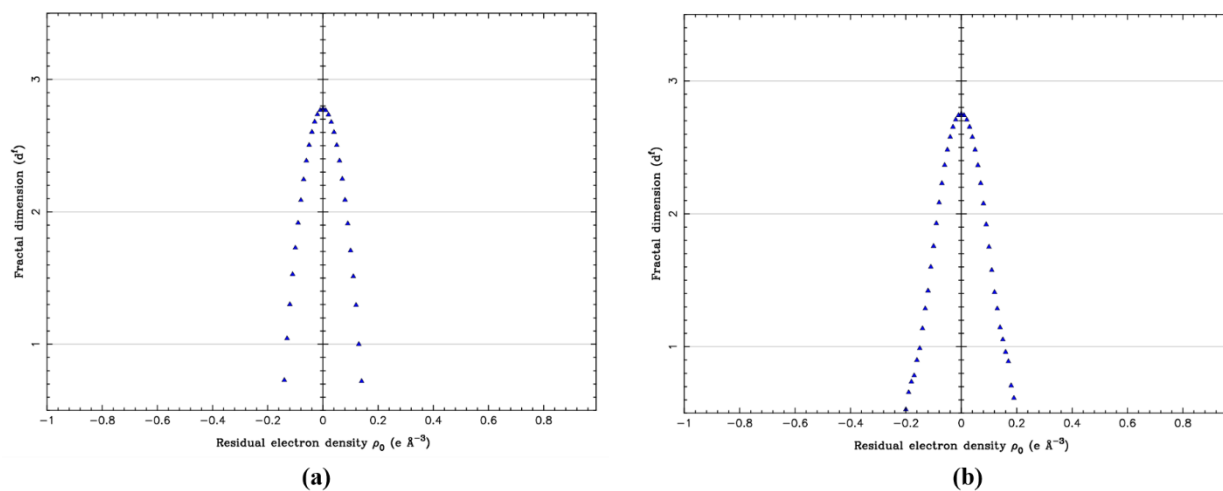

**Figure S3:** Fractal dimension plot based on experimental structure factor for (a) 1P\_T and (b) 1P\_O form.

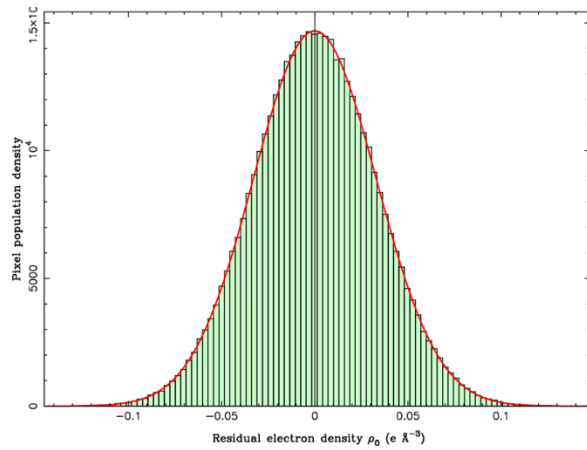

(a)

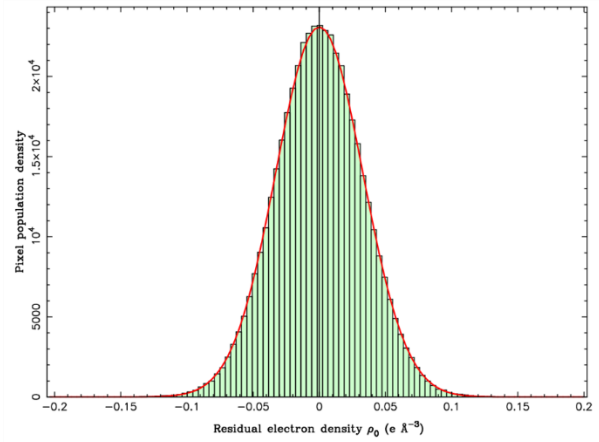

(b)

**Figure S4:** Residual electron density distribution plot based on experimental structure factor for (a) 1P\_T and (b) 1P\_O form.

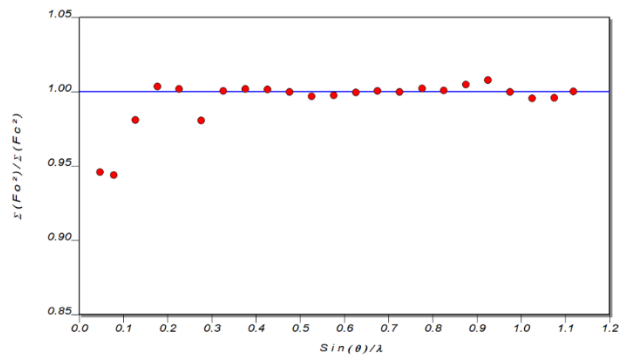

(a)

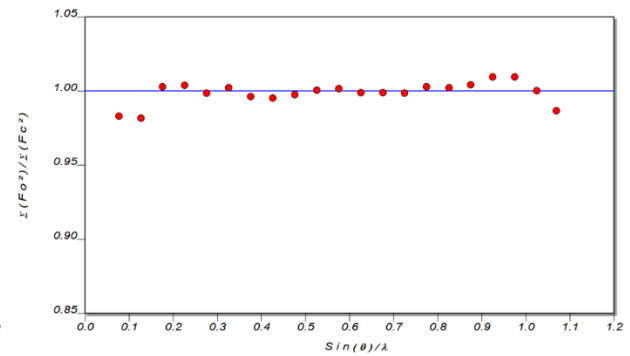

(b)

**Figure S5:** Scale factor vs resolution plot based on experimental structure factor for (a) 1P\_T and (b) 1P\_O form.

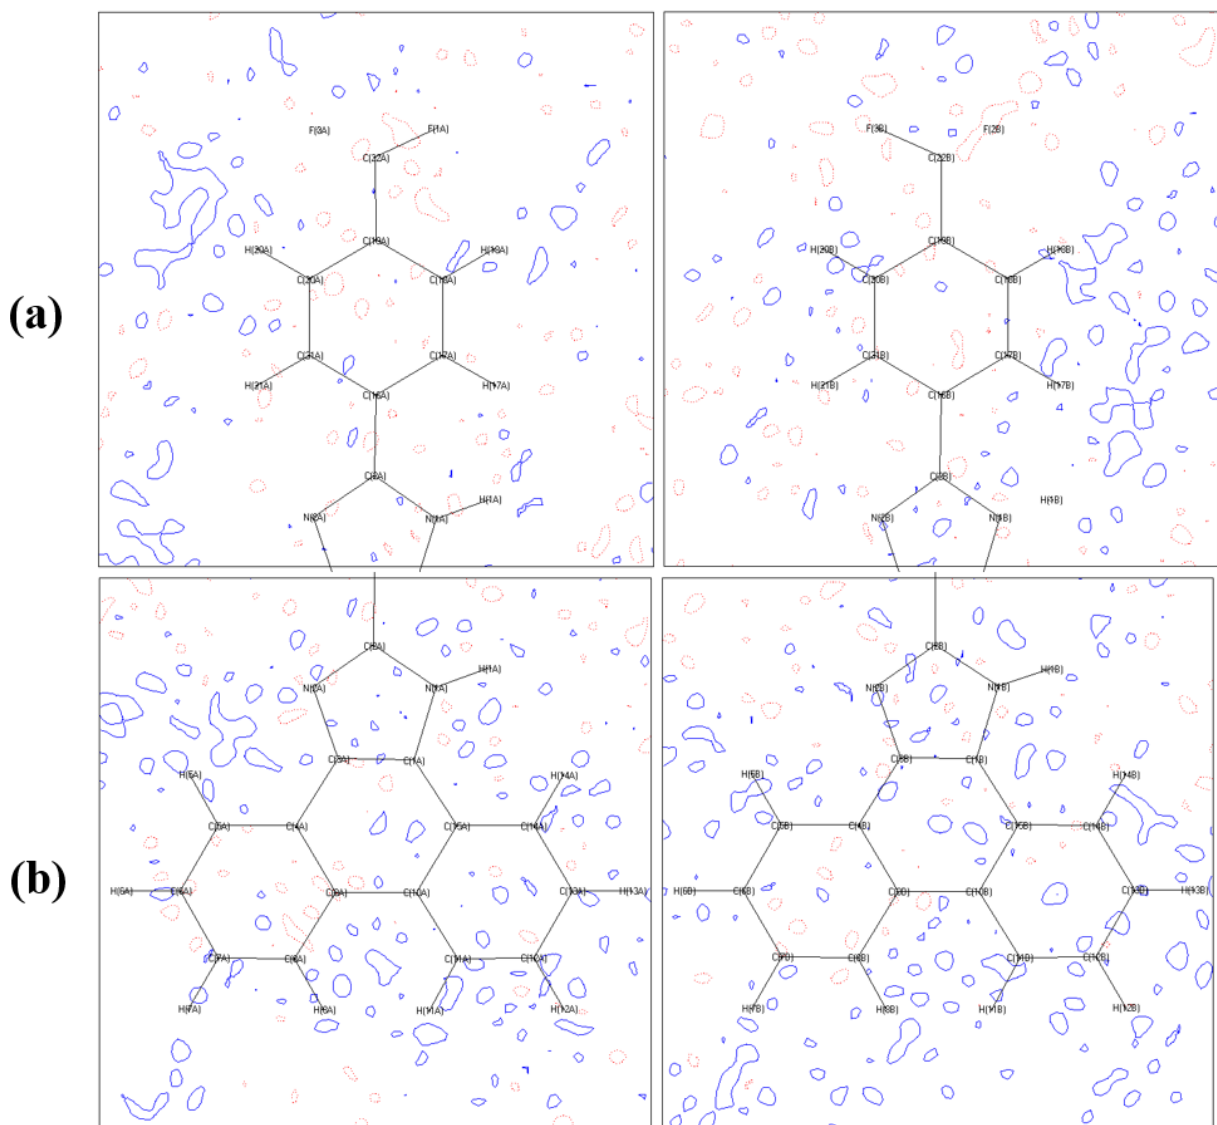

**Figure S6:** Experimental residual density map of 1P\_T for molecule A (left) and molecule B (right) drawn in the plane containing atoms (a) C21, C17, C22, and (b) C7, C12, C2. The positive (solid blue lines) and negative (dashed red lines) contours are drawn starting from  $\pm 0.05 e \text{ \AA}^{-3}$  with an interval of  $0.1 e \text{ \AA}^{-3}$ .

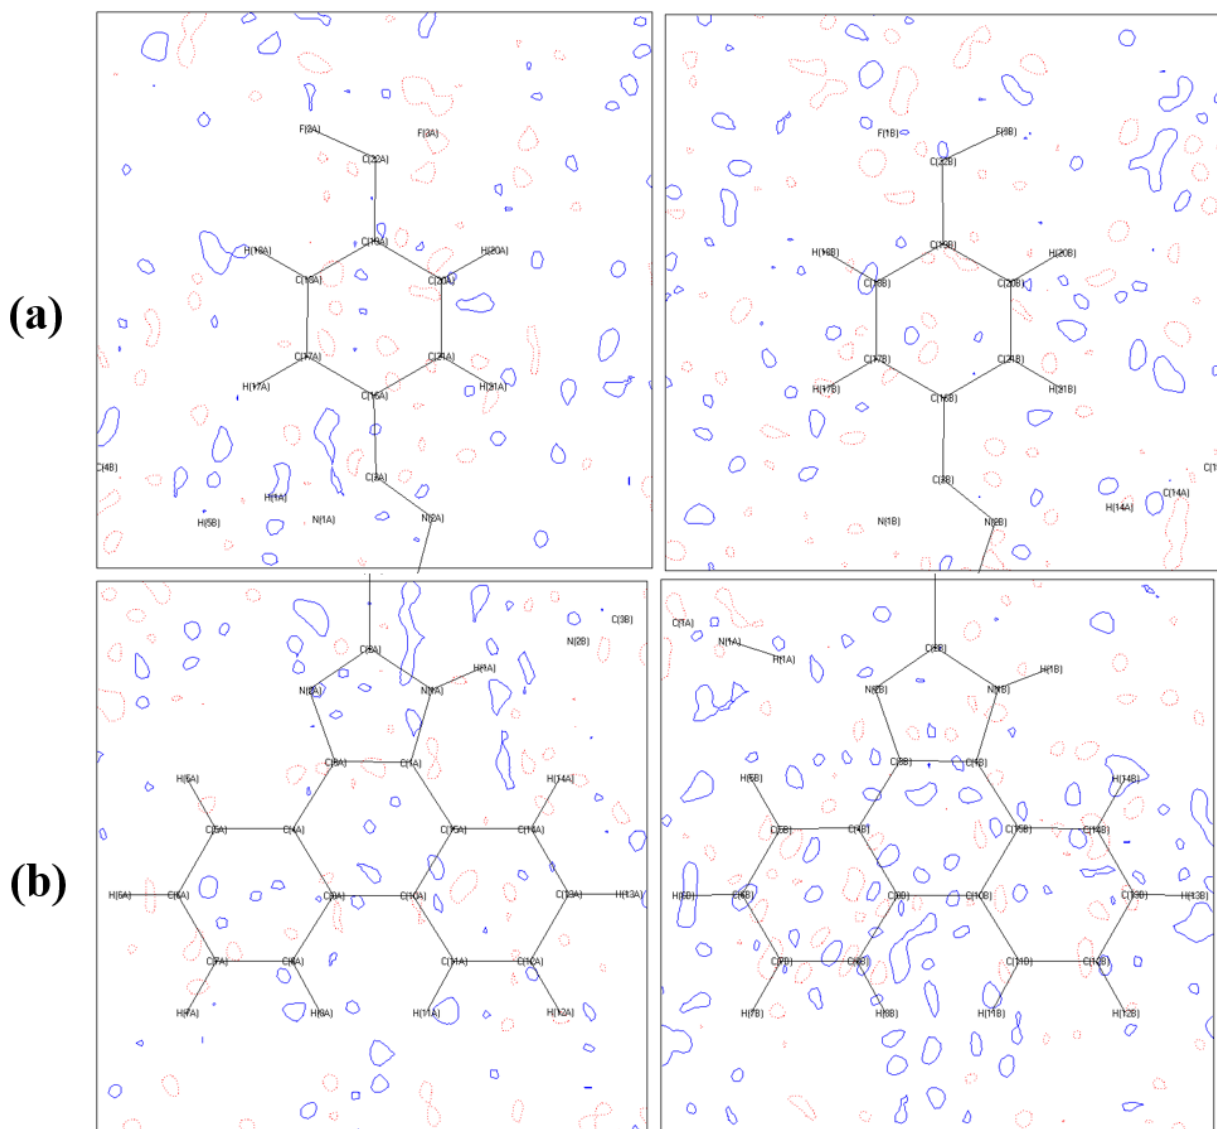

**Figure S7:** Experimental residual density map of 1P\_O for molecule A (left) and molecule B (right) drawn in the plane containing atoms (a) C21, C17, C22, and (b) C7, C12, C2. The positive (solid blue lines) and negative (dashed red lines) contours are drawn starting from  $\pm 0.05 e \text{ \AA}^{-3}$  with an interval of  $0.1 e \text{ \AA}^{-3}$ .

**(a)**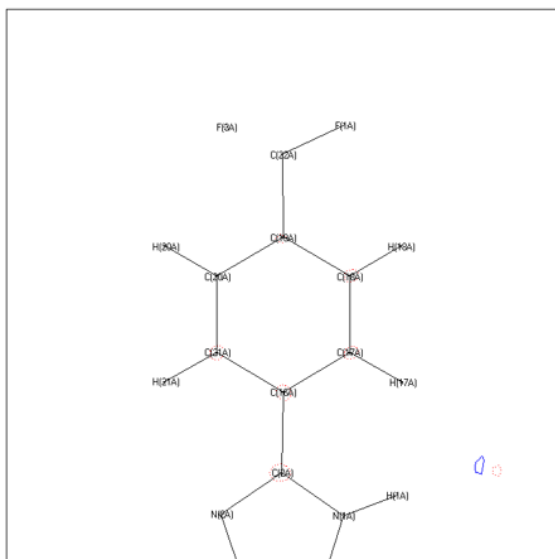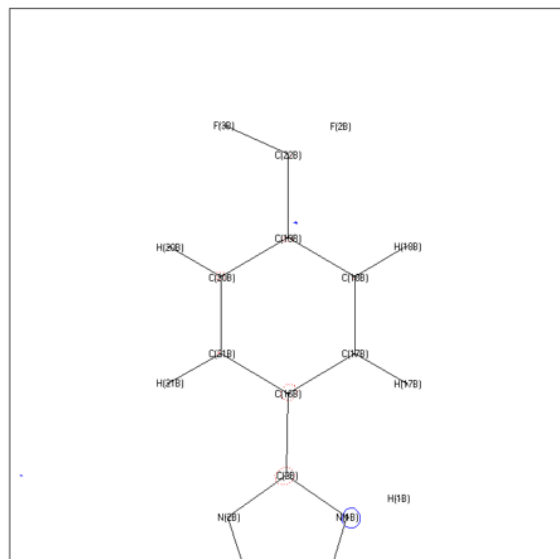**(b)**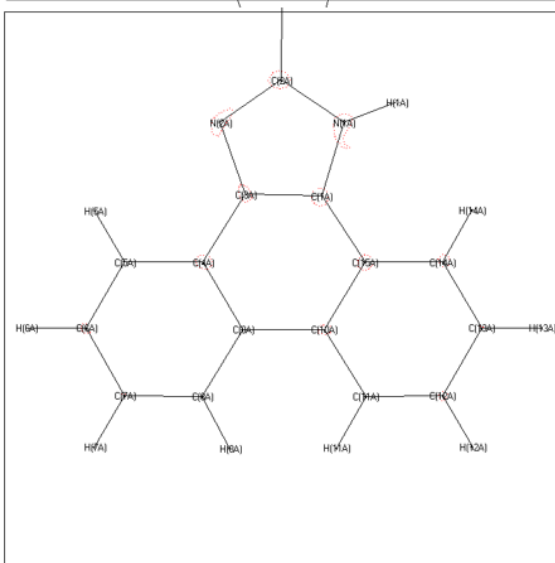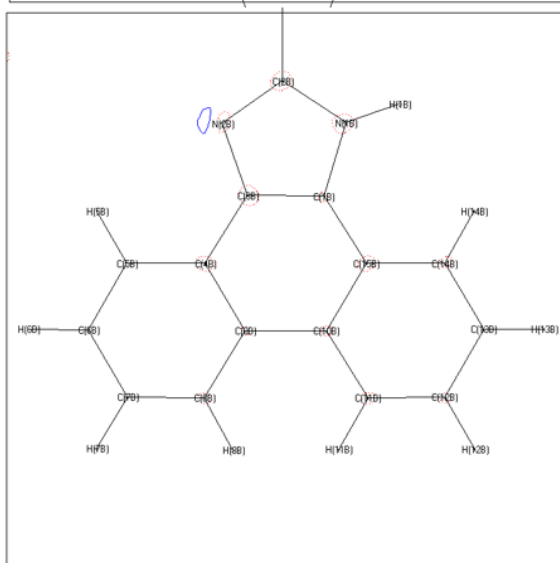

**Figure S8:** Theoretical residual density map of 1P\_T for molecule A (left) and molecule B (right) drawn in the plane containing atoms (a) C21, C17, C22, and (b) C7, C12, C2. The positive (solid blue lines) and negative (dashed red lines) contours are drawn starting from  $\pm 0.05 e \text{ \AA}^{-3}$  with an interval of  $0.1 e \text{ \AA}^{-3}$ .

**(a)**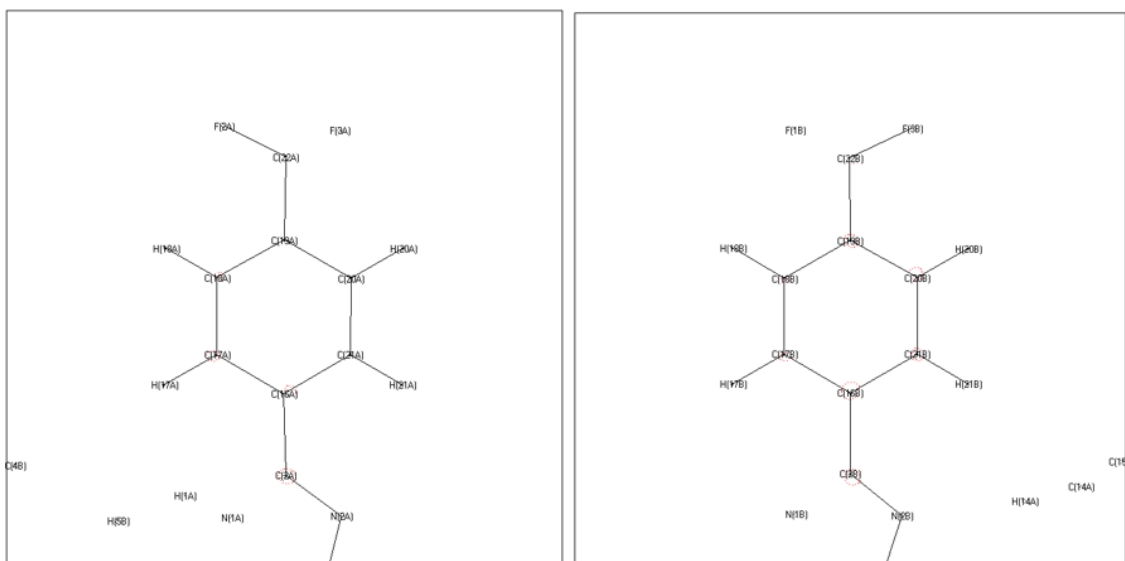**(b)**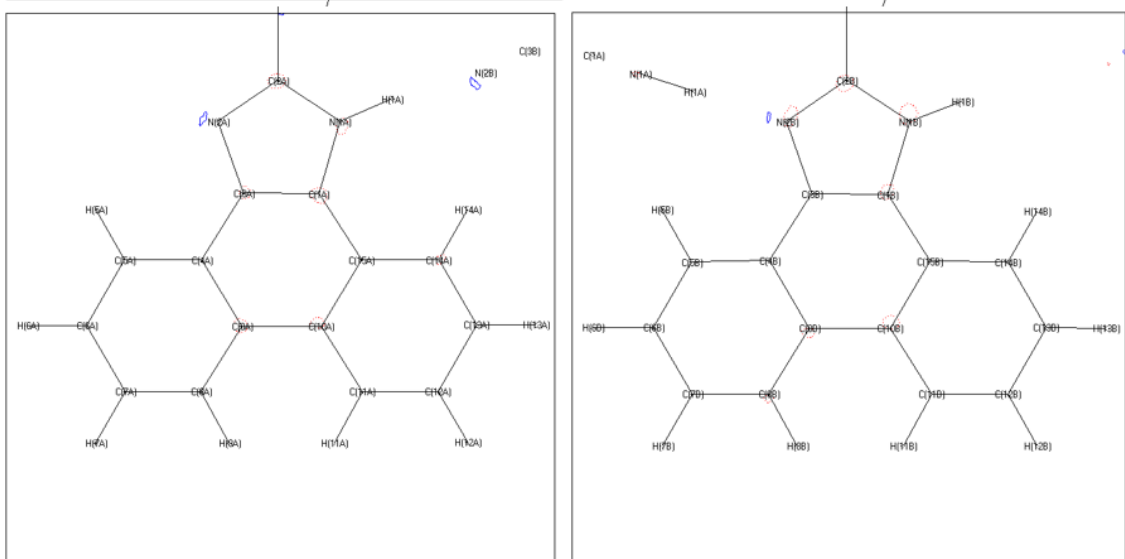

**Figure S9:** Theoretical residual density map of 1P\_O for molecule A (left) and molecule B (right) drawn in the plane containing atoms (a) C21, C17, C22, and (b) C7, C12, C2. The positive (solid blue lines) and negative (dashed red lines) contours are drawn starting from  $\pm 0.05 e \text{ \AA}^{-3}$  with an interval of  $0.1 e \text{ \AA}^{-3}$ .

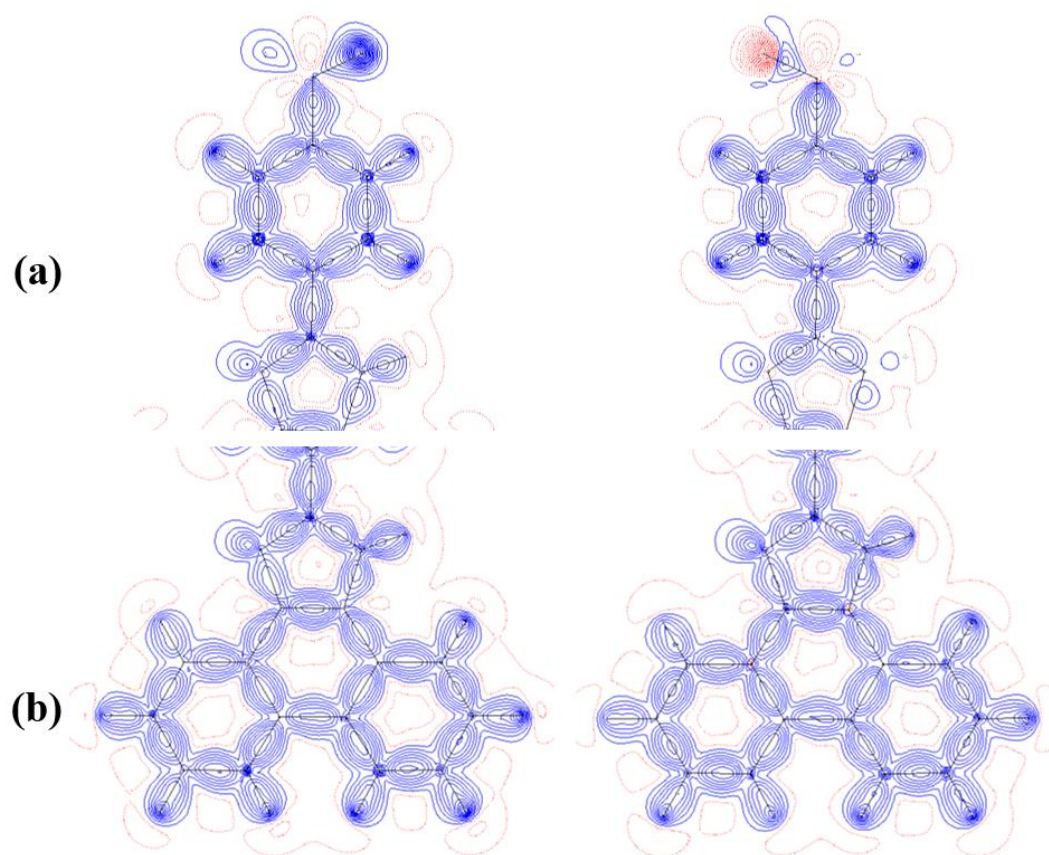

**Figure S10:** Experimental 2D deformation electron density map of 1P\_T for molecule A (left) and molecule B (right), drawn in the plane containing atoms (a) C21, C17, and C22, and (b) C7, C12, and C2. The positive (solid blue lines) and negative (dashed red lines) contours are drawn starting from  $\pm 0.05 e\text{\AA}^{-3}$  with an interval of  $0.1 e\text{\AA}^{-3}$ .

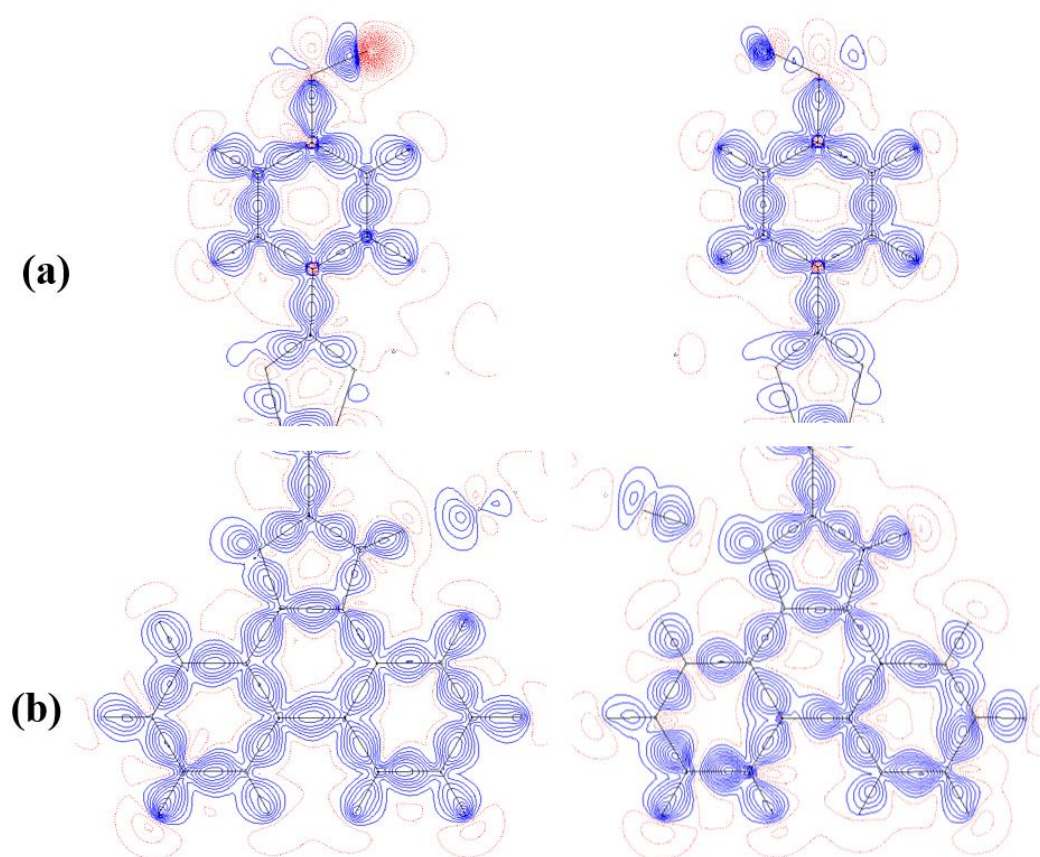

**Figure S11:** Experimental 2D deformation electron density map of 1P\_O for molecule A (left) and molecule B (right), drawn in the plane containing atoms (a) C21, C17, and C22, and (b) C7, C12, and C2. The positive (solid blue lines) and negative (dashed red lines) contours are drawn starting from  $\pm 0.05 e\text{\AA}^{-3}$  with an interval of  $0.1 e\text{\AA}^{-3}$ .

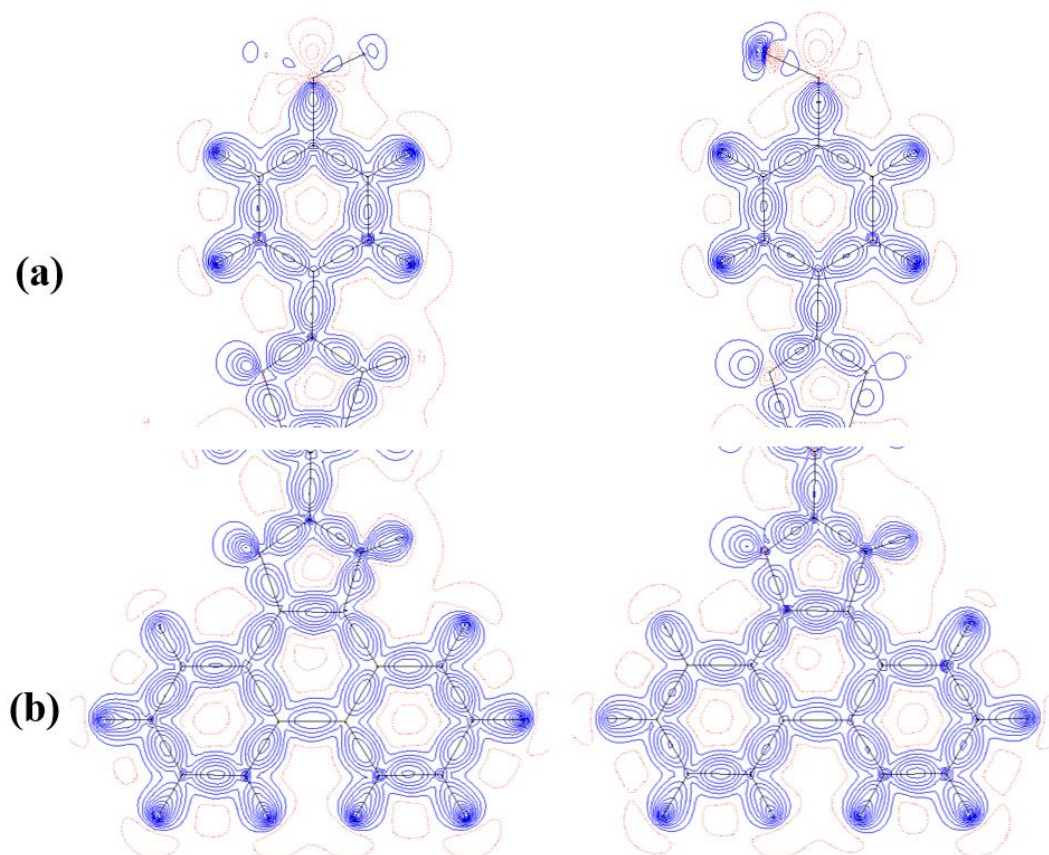

**Figure S12:** Theoretical 2D deformation electron density map of 1P\_T for molecule A (left) and molecule B (right), drawn in the plane containing atoms (a) C21, C17, and C22, and (b) C7, C12, and C2. The positive (solid blue lines) and negative (dashed red lines) contours are drawn starting from  $\pm 0.05 e\text{\AA}^{-3}$  with an interval of  $0.1 e\text{\AA}^{-3}$ .

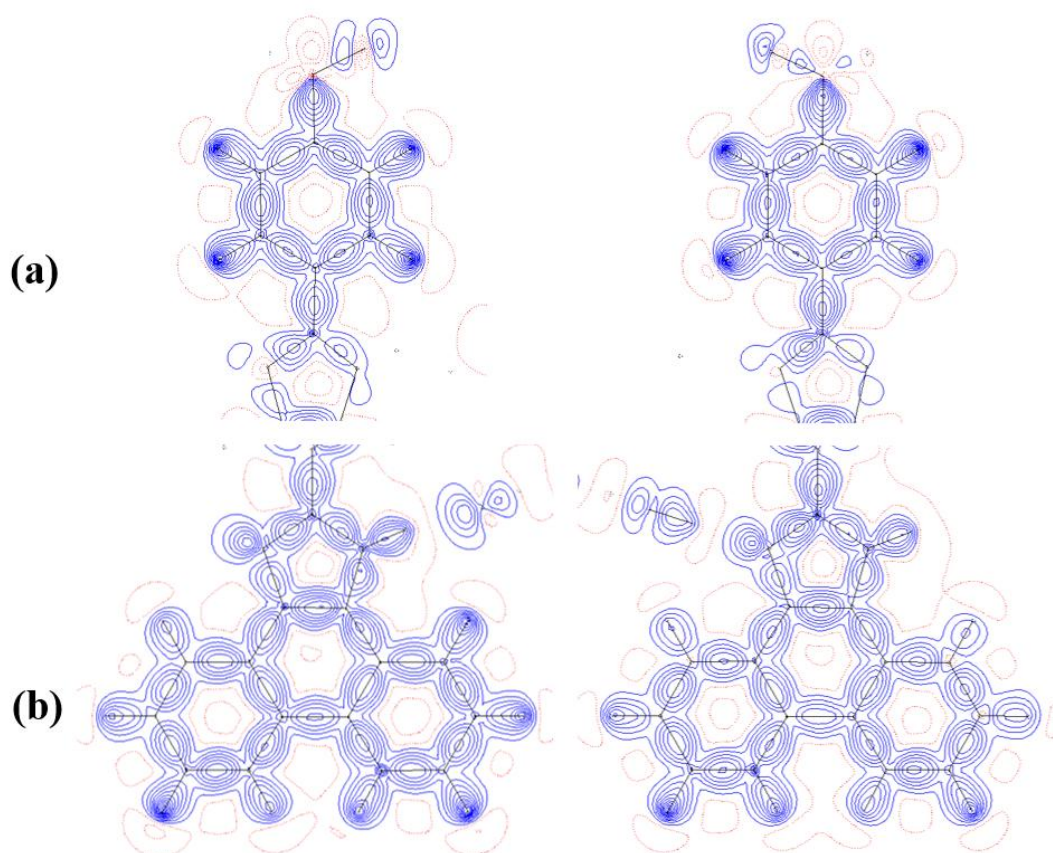

**Figure S13:** Theoretical 2D deformation electron density map of 1P\_O for molecule A (left) and molecule B (right), drawn in the plane containing atoms (a) C21, C17, and C22, and (b) C7, C12, and C2. The positive (solid blue lines) and negative (dashed red lines) contours are drawn starting from  $\pm 0.05 e\text{\AA}^{-3}$  with an interval of  $0.1 e\text{\AA}^{-3}$ .

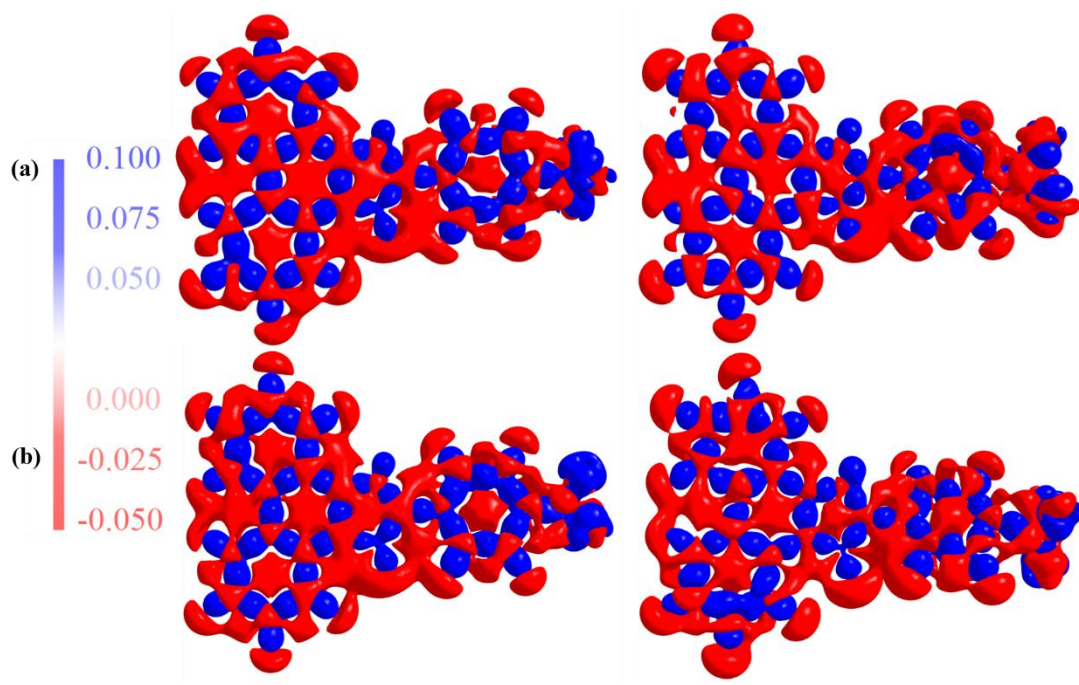

**Figure S14:** Experimental 3D-deformation density maps for (a) molecule A and (b) molecule B of 1P\_T (left) and 1P\_O (right).

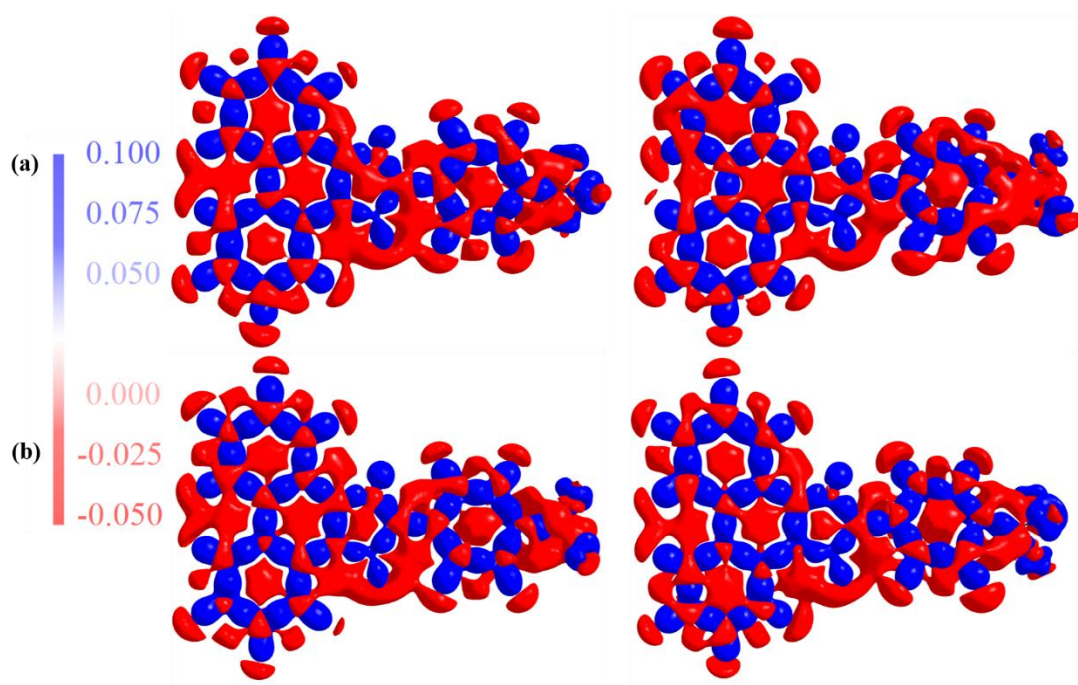

**Figure S15:** Theoretical 3D-deformation density maps for (a) molecule A and (b) molecule B of 1P\_T (left) and 1P\_O (right).

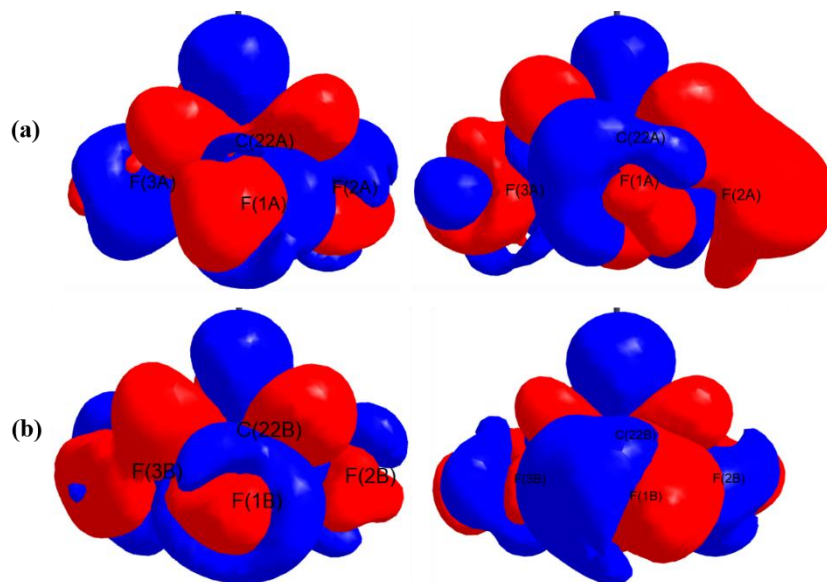

**Figure S16:** Experimental 3D-deformation density maps for  $-\text{CF}_3$  group of (a) molecule A and (b) molecule B of 1P\_T (left) and 1P\_O (right).

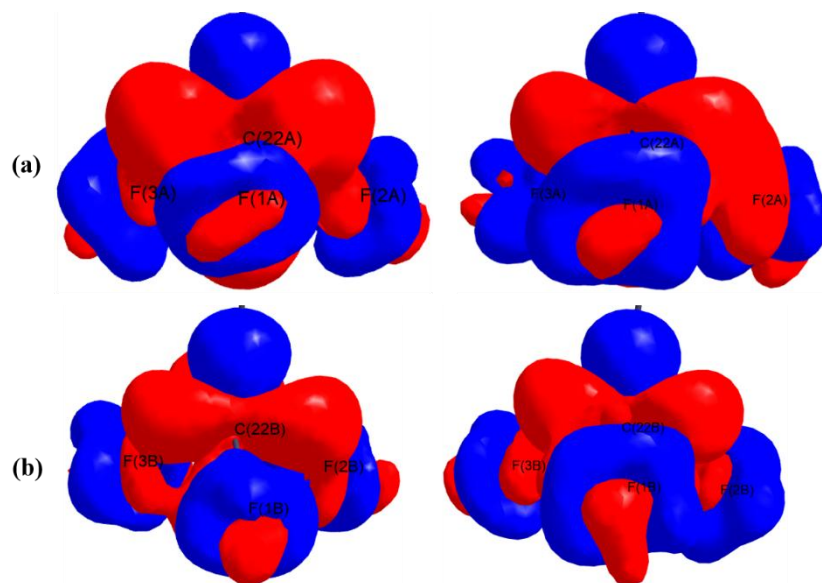

**Figure S17:** Theoretical 3D-deformation density maps for  $-\text{CF}_3$  group of (a) molecule A and (b) molecule B of 1P\_T (left) and 1P\_O (right).

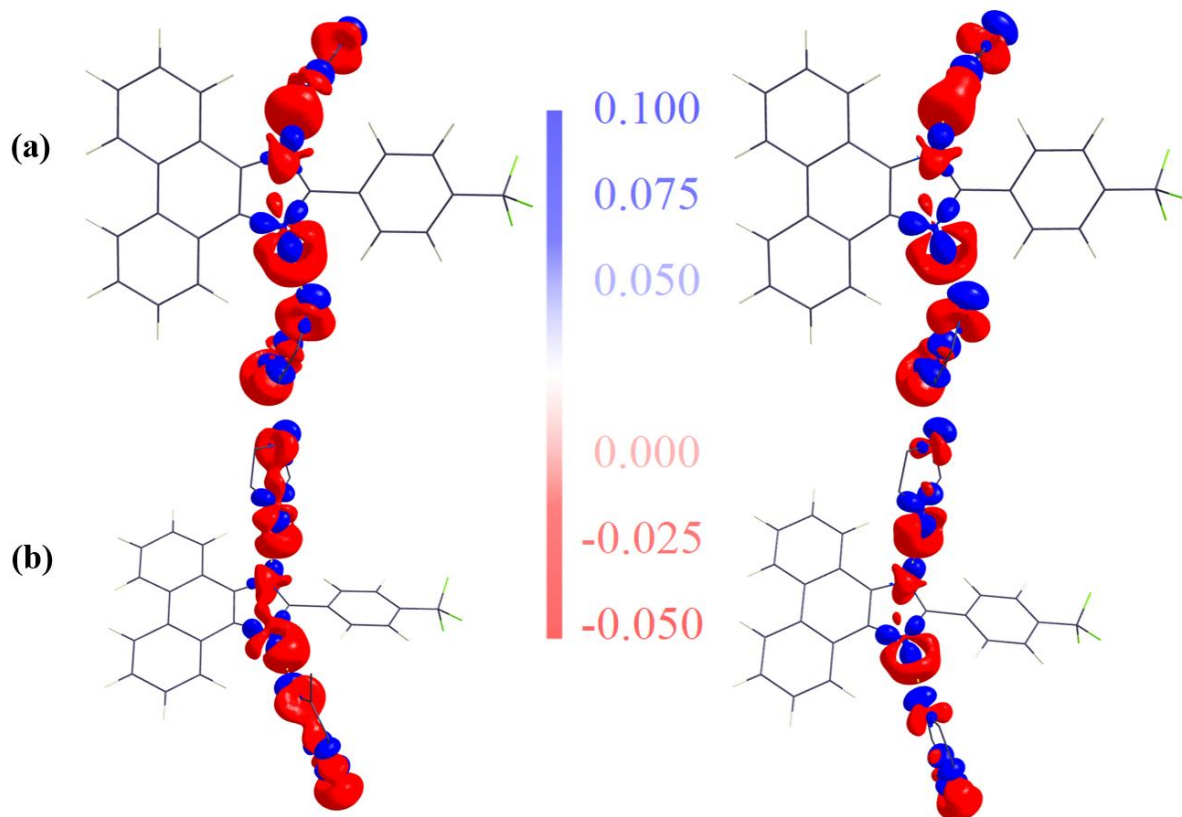

**Figure S18:** Experimental (left) and theoretical (right) 3D-deformation density maps, highlighting the electron density along the proton tautomeric pathway for (a) 1P\_T and (b) 1P\_O.

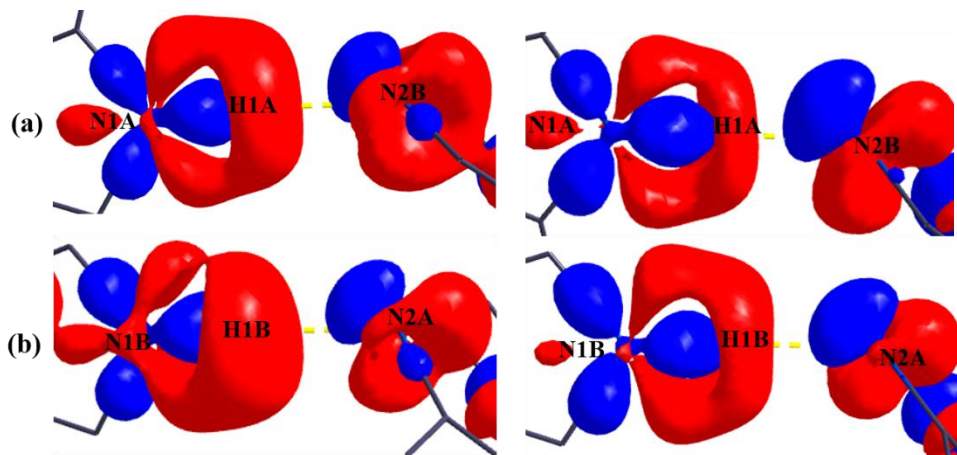

**Figure S19:** Experimental (left) and theoretical (right) 2D-deformation density maps for 1P\_T, highlighting the electron density distribution in (a) N1A-H1A...N2B and (b) N1B-H1B...N2A hydrogen bonding region.

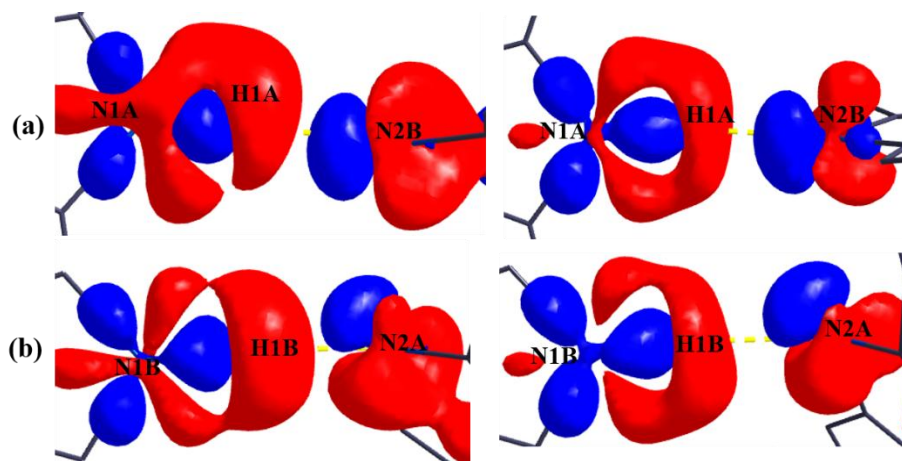

**Figure S20:** Experimental (left) and theoretical (right) 2D-deformation density maps for 1P\_O, highlighting the electron density distribution in (a) N1A-H1A...N2B and (b) N1B-H1B...N2A hydrogen bonding region.

**Table S3:** Experimental (values in the first rows) and theoretical (values in italics in the second rows) topological parameters for the covalent bonds of 1P\_T and those of 1P\_O are listed in the third and fourth rows, respectively.

| Bond         | $\rho$                 | $\nabla^2\rho$         | $R_{ij}$     | $\lambda_1$   | $\lambda_2$   | $\lambda_3$  | $\varepsilon$ |
|--------------|------------------------|------------------------|--------------|---------------|---------------|--------------|---------------|
|              | ( $e\text{\AA}^{-3}$ ) | ( $e\text{\AA}^{-5}$ ) | $\text{\AA}$ |               |               |              |               |
| F(1A)-C(22A) | 1.966(21)              | -16.377(105)           | 1.374        | -15.46        | -14.02        | 13.10        | 0.10          |
|              | <i>1.906(7)</i>        | <i>-14.29(34)</i>      | <i>1.358</i> | <i>-15.52</i> | <i>-14.71</i> | <i>15.94</i> | <i>0.06</i>   |
|              | 2.174(46)              | -20.722(211)           | 1.334        | -18.93        | -17.67        | 15.88        | 0.07          |
|              | <i>2.038(8)</i>        | <i>-19.69(42)</i>      | <i>1.331</i> | <i>-16.61</i> | <i>-16.05</i> | <i>12.96</i> | <i>0.03</i>   |
| F(2A)-C(22A) | 1.939(19)              | -10.449(106)           | 1.349        | -14.65        | -12.33        | 16.53        | 0.19          |
|              | <i>1.949(7)</i>        | <i>-15.984(33)</i>     | <i>1.344</i> | <i>-15.43</i> | <i>-15.25</i> | <i>14.70</i> | <i>0.01</i>   |
|              | 1.989(50)              | -15.201(271)           | 1.349        | -17.87        | -17.27        | 19.94        | 0.03          |
|              | <i>1.956(8)</i>        | <i>-14.938(51)</i>     | <i>1.325</i> | <i>-15.99</i> | <i>-14.28</i> | <i>15.33</i> | <i>0.12</i>   |
| F(3A)-C(22A) | 2.087(19)              | -20.816(105)           | 1.344        | -16.85        | -15.63        | 11.67        | 0.08          |
|              | <i>1.969(7)</i>        | <i>-17.454(37)</i>     | <i>1.345</i> | <i>-16.08</i> | <i>-15.49</i> | <i>14.12</i> | <i>0.04</i>   |
|              | 1.875(47)              | -11.011(213)           | 1.361        | -15.13        | -11.71        | 15.83        | 0.29          |
|              | <i>1.745(8)</i>        | <i>-9.741(41)</i>      | <i>1.361</i> | <i>-12.50</i> | <i>-11.24</i> | <i>14.00</i> | <i>0.11</i>   |

|              |                 |                    |              |               |               |              |             |
|--------------|-----------------|--------------------|--------------|---------------|---------------|--------------|-------------|
| N(1A)-C(1A)  | 2.105(15)       | -19.255(68)        | 1.375        | -16.52        | -14.19        | 11.46        | 0.16        |
|              | <i>2.052(4)</i> | <i>-15.351(15)</i> | <i>1.374</i> | <i>-14.57</i> | <i>-12.86</i> | <i>12.08</i> | <i>0.13</i> |
|              | 1.960(31)       | -17.232(148)       | 1.377        | -13.62        | -12.99        | 9.38         | 0.05        |
|              | <i>2.034(4)</i> | <i>-15.228(16)</i> | <i>1.379</i> | <i>-14.40</i> | <i>-12.51</i> | <i>11.68</i> | <i>0.15</i> |
| N(1A)-C(2A)  | 2.201(14)       | -21.181(65)        | 1.366        | -18.40        | -14.30        | 11.52        | 0.29        |
|              | <i>2.129(4)</i> | <i>-18.27(17)</i>  | <i>1.367</i> | <i>-16.26</i> | <i>-13.46</i> | <i>11.45</i> | <i>0.21</i> |
|              | 2.195(25)       | -23.753(109)       | 1.363        | -17.78        | -13.70        | 7.73         | 0.30        |
|              | <i>2.147(2)</i> | <i>-19.192(11)</i> | <i>1.364</i> | <i>-15.29</i> | <i>-13.47</i> | <i>9.56</i>  | <i>0.14</i> |
| N(2A)-C(2A)  | 2.491(21)       | -23.416(82)        | 1.334        | -20.46        | -17.65        | 14.69        | 0.16        |
|              | <i>2.361(5)</i> | <i>-20.973(21)</i> | <i>1.334</i> | <i>-17.91</i> | <i>-15.96</i> | <i>12.90</i> | <i>0.12</i> |
|              | 2.451(32)       | -25.126(122)       | 1.334        | -19.89        | -16.77        | 11.53        | 0.19        |
|              | <i>2.325(3)</i> | <i>-20.758(13)</i> | <i>1.334</i> | <i>-17.12</i> | <i>-15.02</i> | <i>11.38</i> | <i>0.14</i> |
| N(2A)-C(3A)  | 2.132(18)       | -15.58(69)         | 1.381        | -16.71        | -14.85        | 15.98        | 0.13        |
|              | <i>2.114(4)</i> | <i>-14.284(13)</i> | <i>1.381</i> | <i>-15.19</i> | <i>-13.87</i> | <i>14.77</i> | <i>0.09</i> |
|              | 2.164(33)       | -17.972(128)       | 1.383        | -16.98        | -14.94        | 13.95        | 0.14        |
|              | <i>2.076(3)</i> | <i>-13.231(10)</i> | <i>1.382</i> | <i>-14.71</i> | <i>-13.35</i> | <i>14.83</i> | <i>0.10</i> |
| C(1A)-C(3A)  | 2.232(18)       | -20.98(54)         | 1.385        | -17.78        | -13.91        | 10.72        | 0.28        |
|              | <i>2.134(4)</i> | <i>-17.674(12)</i> | <i>1.385</i> | <i>-15.52</i> | <i>-12.44</i> | <i>10.29</i> | <i>0.25</i> |
|              | 2.195(36)       | -19.504(101)       | 1.385        | -17.03        | -13.47        | 10.99        | 0.26        |
|              | <i>2.158(4)</i> | <i>-18.485(12)</i> | <i>1.385</i> | <i>-15.84</i> | <i>-13.04</i> | <i>10.39</i> | <i>0.21</i> |
| C(1A)-C(15A) | 2.026(15)       | -17.005(43)        | 1.429        | -15.81        | -12.74        | 11.54        | 0.24        |
|              | <i>1.932(3)</i> | <i>-14.502(10)</i> | <i>1.429</i> | <i>-13.68</i> | <i>-11.81</i> | <i>10.99</i> | <i>0.16</i> |
|              | 1.975(30)       | -15.459(76)        | 1.431        | -14.49        | -12.32        | 11.35        | 0.18        |
|              | <i>1.947(3)</i> | <i>-14.768(8)</i>  | <i>1.430</i> | <i>-13.80</i> | <i>-12.02</i> | <i>11.06</i> | <i>0.15</i> |
| C(2A)-C(16A) | 1.882(20)       | -14.097(58)        | 1.465        | -14.82        | -11.88        | 12.61        | 0.25        |
|              | <i>1.833(3)</i> | <i>-12.631(9)</i>  | <i>1.465</i> | <i>-12.82</i> | <i>-11.06</i> | <i>11.24</i> | <i>0.16</i> |
|              | 1.862(31)       | -14.772(87)        | 1.466        | -14.30        | -11.66        | 11.18        | 0.23        |
|              | <i>1.807(2)</i> | <i>-12.401(6)</i>  | <i>1.466</i> | <i>-12.29</i> | <i>-10.52</i> | <i>10.41</i> | <i>0.17</i> |
|              | 1.982(15)       | -17.033(44)        | 1.435        | -15.84        | -12.85        | 11.66        | 0.23        |
|              | <i>1.929(3)</i> | <i>-14.688(8)</i>  | <i>1.435</i> | <i>-13.69</i> | <i>-11.60</i> | <i>10.60</i> | <i>0.18</i> |

|              |                 |                   |              |               |               |              |             |
|--------------|-----------------|-------------------|--------------|---------------|---------------|--------------|-------------|
| C(3A)-C(4A)  | 2.006(27)       | -17.513(68)       | 1.434        | -15.36        | -12.55        | 10.40        | 0.22        |
|              | <i>1.904(3)</i> | <i>-14.122(8)</i> | <i>1.434</i> | <i>-13.42</i> | <i>-11.53</i> | <i>10.83</i> | <i>0.16</i> |
| C(4A)-C(5A)  | 2.067(13)       | -17.449(33)       | 1.408        | -15.50        | -13.13        | 11.18        | 0.18        |
|              | <i>2.038(3)</i> | <i>-16.347(7)</i> | <i>1.408</i> | <i>-14.38</i> | <i>-12.27</i> | <i>10.31</i> | <i>0.17</i> |
|              | 2.095(24)       | -18.335(55)       | 1.409        | -15.71        | -12.81        | 10.18        | 0.23        |
|              | <i>2.020(2)</i> | <i>-15.58(6)</i>  | <i>1.409</i> | <i>-13.86</i> | <i>-12.12</i> | <i>10.40</i> | <i>0.14</i> |
| C(4A)-C(9A)  | 2.058(16)       | -17.285(44)       | 1.421        | -16.05        | -13.38        | 12.15        | 0.20        |
|              | <i>1.973(3)</i> | <i>-15.095(8)</i> | <i>1.421</i> | <i>-13.68</i> | <i>-12.16</i> | <i>10.75</i> | <i>0.12</i> |
|              | 2.066(24)       | -18.342(59)       | 1.421        | -15.32        | -13.09        | 10.07        | 0.17        |
|              | <i>1.956(3)</i> | <i>-14.494(8)</i> | <i>1.420</i> | <i>-13.69</i> | <i>-11.75</i> | <i>10.94</i> | <i>0.17</i> |
| C(5A)-C(6A)  | 2.189(12)       | -19.872(32)       | 1.380        | -16.70        | -13.17        | 10.00        | 0.27        |
|              | <i>2.190(2)</i> | <i>-19.457(7)</i> | <i>1.380</i> | <i>-15.68</i> | <i>-13.17</i> | <i>9.39</i>  | <i>0.19</i> |
|              | 2.202(27)       | -21.292(72)       | 1.382        | -16.90        | -13.33        | 8.93         | 0.27        |
|              | <i>2.090(2)</i> | <i>-16.731(5)</i> | <i>1.382</i> | <i>-13.95</i> | <i>-12.29</i> | <i>9.51</i>  | <i>0.13</i> |
| C(6A)-C(7A)  | 2.148(13)       | -19.676(34)       | 1.404        | -16.32        | -13.20        | 9.84         | 0.24        |
|              | <i>2.057(3)</i> | <i>-16.581(7)</i> | <i>1.404</i> | <i>-14.26</i> | <i>-12.23</i> | <i>9.91</i>  | <i>0.17</i> |
|              | 2.125(30)       | -20.322(71)       | 1.405        | -16.72        | -13.12        | 9.52         | 0.27        |
|              | <i>1.993(2)</i> | <i>-15.42(5)</i>  | <i>1.406</i> | <i>-13.51</i> | <i>-11.72</i> | <i>9.81</i>  | <i>0.15</i> |
| C(7A)-C(8A)  | 2.171(13)       | -20.131(34)       | 1.384        | -16.48        | -13.45        | 9.80         | 0.22        |
|              | <i>2.106(3)</i> | <i>-17.671(7)</i> | <i>1.384</i> | <i>-14.63</i> | <i>-12.53</i> | <i>9.49</i>  | <i>0.17</i> |
|              | 2.237(30)       | -21.038(74)       | 1.385        | -17.29        | -13.45        | 9.70         | 0.29        |
|              | <i>2.150(2)</i> | <i>-19.453(6)</i> | <i>1.386</i> | <i>-15.15</i> | <i>-13.26</i> | <i>8.96</i>  | <i>0.14</i> |
| C(8A)-C(9A)  | 2.156(14)       | -19.183(36)       | 1.412        | -16.73        | -13.85        | 11.40        | 0.21        |
|              | <i>2.029(3)</i> | <i>-16.454(7)</i> | <i>1.412</i> | <i>-14.15</i> | <i>-12.52</i> | <i>10.21</i> | <i>0.13</i> |
|              | 2.059(24)       | -17.697(56)       | 1.411        | -15.17        | -12.47        | 9.94         | 0.22        |
|              | <i>2.014(2)</i> | <i>-16.416(6)</i> | <i>1.411</i> | <i>-14.40</i> | <i>-11.99</i> | <i>9.97</i>  | <i>0.20</i> |
| C(9A)-C(10A) | 1.893(15)       | -13.294(37)       | 1.469        | -14.04        | -12.04        | 12.79        | 0.17        |
|              | <i>1.765(3)</i> | <i>-11.039(8)</i> | <i>1.468</i> | <i>-11.98</i> | <i>-10.37</i> | <i>11.31</i> | <i>0.15</i> |
|              | 1.940(24)       | -14.921(55)       | 1.466        | -13.91        | -12.15        | 11.14        | 0.14        |
|              | <i>1.795(3)</i> | <i>-12.133(7)</i> | <i>1.465</i> | <i>-12.39</i> | <i>-10.87</i> | <i>11.13</i> | <i>0.14</i> |

|               |                 |                   |              |               |               |              |             |
|---------------|-----------------|-------------------|--------------|---------------|---------------|--------------|-------------|
| C(10A)-C(11A) | 2.150(13)       | -18.078(33)       | 1.411        | -16.30        | -13.42        | 11.64        | 0.21        |
|               | <i>1.992(3)</i> | <i>-15.051(7)</i> | <i>1.410</i> | <i>-13.85</i> | <i>-11.59</i> | <i>10.39</i> | <i>0.20</i> |
|               | 2.073(24)       | -17.979(53)       | 1.411        | -15.57        | -12.62        | 10.22        | 0.23        |
|               | <i>2.038(2)</i> | <i>-16.059(6)</i> | <i>1.412</i> | <i>-14.23</i> | <i>-12.20</i> | <i>10.37</i> | <i>0.17</i> |
| C(10A)-C(15A) | 2.057(16)       | -16.633(44)       | 1.421        | -15.92        | -13.24        | 12.52        | 0.20        |
|               | <i>1.943(3)</i> | <i>-13.771(8)</i> | <i>1.421</i> | <i>-13.22</i> | <i>-11.52</i> | <i>10.97</i> | <i>0.15</i> |
|               | 2.074(24)       | -17.43(58)        | 1.423        | -14.75        | -13.25        | 10.58        | 0.11        |
|               | <i>1.960(3)</i> | <i>-14.228(8)</i> | <i>1.422</i> | <i>-13.78</i> | <i>-11.59</i> | <i>11.15</i> | <i>0.19</i> |
| C(11A)-C(12A) | 2.195(12)       | -19.422(33)       | 1.385        | -16.37        | -13.23        | 10.18        | 0.24        |
|               | <i>2.089(3)</i> | <i>-17.191(7)</i> | <i>1.385</i> | <i>-14.58</i> | <i>-12.15</i> | <i>9.54</i>  | <i>0.20</i> |
|               | 2.206(29)       | -21.029(77)       | 1.384        | -16.65        | -13.41        | 9.03         | 0.24        |
|               | <i>2.063(2)</i> | <i>-16.608(5)</i> | <i>1.384</i> | <i>-14.30</i> | <i>-11.87</i> | <i>9.57</i>  | <i>0.20</i> |
| C(12A)-C(13A) | 2.134(13)       | -19.278(33)       | 1.401        | -15.73        | -13.57        | 10.02        | 0.16        |
|               | <i>2.026(2)</i> | <i>-16.227(6)</i> | <i>1.401</i> | <i>-14.05</i> | <i>-11.91</i> | <i>9.73</i>  | <i>0.18</i> |
|               | 2.107(28)       | -18.809(67)       | 1.406        | -15.44        | -13.20        | 9.83         | 0.17        |
|               | <i>2.044(2)</i> | <i>-16.306(5)</i> | <i>1.405</i> | <i>-13.74</i> | <i>-12.29</i> | <i>9.72</i>  | <i>0.12</i> |
| C(13A)-C(14A) | 2.218(12)       | -21.55(32)        | 1.380        | -17.19        | -13.88        | 9.53         | 0.24        |
|               | <i>2.145(3)</i> | <i>-19.336(7)</i> | <i>1.381</i> | <i>-15.25</i> | <i>-13.14</i> | <i>9.06</i>  | <i>0.16</i> |
|               | 2.157(26)       | -20.334(63)       | 1.384        | -16.48        | -13.11        | 9.25         | 0.26        |
|               | <i>2.108(2)</i> | <i>-17.451(6)</i> | <i>1.384</i> | <i>-14.58</i> | <i>-12.33</i> | <i>9.46</i>  | <i>0.18</i> |
| C(14A)-C(15A) | 2.094(13)       | -17.98(33)        | 1.408        | -16.18        | -12.99        | 11.19        | 0.24        |
|               | <i>2.001(3)</i> | <i>-15.533(7)</i> | <i>1.408</i> | <i>-13.99</i> | <i>-11.86</i> | <i>10.31</i> | <i>0.18</i> |
|               | 2.025(24)       | -17.085(56)       | 1.411        | -15.13        | -11.90        | 9.95         | 0.27        |
|               | <i>1.991(2)</i> | <i>-14.783(6)</i> | <i>1.411</i> | <i>-13.77</i> | <i>-11.57</i> | <i>10.56</i> | <i>0.19</i> |
| C(16A)-C(17A) | 2.070(21)       | -15.664(55)       | 1.404        | -15.67        | -13.04        | 13.05        | 0.20        |
|               | <i>1.984(3)</i> | <i>-14.853(9)</i> | <i>1.404</i> | <i>-13.53</i> | <i>-11.86</i> | <i>10.54</i> | <i>0.14</i> |
|               | 2.155(33)       | -20.105(92)       | 1.396        | -16.39        | -13.24        | 9.52         | 0.24        |
|               | <i>2.047(3)</i> | <i>-16.33(8)</i>  | <i>1.398</i> | <i>-13.91</i> | <i>-12.54</i> | <i>10.12</i> | <i>0.11</i> |
|               | 2.138(21)       | -17.73(53)        | 1.400        | -16.52        | -13.97        | 12.76        | 0.18        |
|               | <i>2.046(3)</i> | <i>-16.288(9)</i> | <i>1.399</i> | <i>-14.25</i> | <i>-12.39</i> | <i>10.36</i> | <i>0.15</i> |

|               |                 |                    |              |               |               |              |             |
|---------------|-----------------|--------------------|--------------|---------------|---------------|--------------|-------------|
| C(16A)-C(21A) | 2.040(30)       | -17.613(62)        | 1.403        | -15.68        | -11.39        | 9.45         | 0.38        |
|               | <i>2.041(3)</i> | <i>-16.111(8)</i>  | <i>1.402</i> | <i>-14.19</i> | <i>-12.11</i> | <i>10.18</i> | <i>0.17</i> |
| C(17A)-C(18A) | 2.198(13)       | -19.512(36)        | 1.391        | -16.64        | -13.37        | 10.49        | 0.24        |
|               | <i>2.075(3)</i> | <i>-16.788(7)</i>  | <i>1.391</i> | <i>-14.32</i> | <i>-12.27</i> | <i>9.80</i>  | <i>0.17</i> |
|               | 2.145(16)       | -20.671(39)        | 1.395        | -15.24        | -12.29        | 6.86         | 0.24        |
|               | <i>2.053(2)</i> | <i>-16.35(6)</i>   | <i>1.395</i> | <i>-14.17</i> | <i>-12.16</i> | <i>9.98</i>  | <i>0.16</i> |
| C(18A)-C(19A) | 2.205(21)       | -19.299(61)        | 1.392        | -17.21        | -14.47        | 12.38        | 0.19        |
|               | <i>2.088(3)</i> | <i>-17.672(7)</i>  | <i>1.392</i> | <i>-14.66</i> | <i>-12.40</i> | <i>9.39</i>  | <i>0.18</i> |
|               | 2.003(43)       | -15.572(68)        | 1.393        | -14.07        | -11.75        | 10.25        | 0.20        |
|               | <i>2.079(2)</i> | <i>-17.562(6)</i>  | <i>1.391</i> | <i>-14.63</i> | <i>-12.32</i> | <i>9.39</i>  | <i>0.19</i> |
| C(19A)-C(20A) | 2.158(21)       | -18.309(52)        | 1.394        | -16.81        | -14.01        | 12.51        | 0.20        |
|               | <i>2.071(3)</i> | <i>-17.616(8)</i>  | <i>1.393</i> | <i>-14.25</i> | <i>-12.46</i> | <i>9.09</i>  | <i>0.14</i> |
|               | 2.078(46)       | -17.437(99)        | 1.395        | -16.52        | -11.65        | 10.73        | 0.42        |
|               | <i>2.034(2)</i> | <i>-16.023(7)</i>  | <i>1.395</i> | <i>-13.95</i> | <i>-11.83</i> | <i>9.76</i>  | <i>0.18</i> |
| C(19A)-C(22A) | 1.854(20)       | -13.702(61)        | 1.500        | -13.53        | -12.38        | 12.21        | 0.09        |
|               | <i>1.794(4)</i> | <i>-12.449(8)</i>  | <i>1.500</i> | <i>-12.42</i> | <i>-11.45</i> | <i>11.42</i> | <i>0.09</i> |
|               | 1.841(48)       | -13.178(117)       | 1.495        | -14.64        | -13.18        | 14.65        | 0.11        |
|               | <i>1.804(5)</i> | <i>-12.64(8)</i>   | <i>1.497</i> | <i>-12.14</i> | <i>-11.63</i> | <i>11.13</i> | <i>0.04</i> |
| C(20A)-C(21A) | 2.221(13)       | -20.143(37)        | 1.389        | -17.03        | -13.56        | 10.45        | 0.26        |
|               | <i>2.062(3)</i> | <i>-16.813(7)</i>  | <i>1.389</i> | <i>-14.25</i> | <i>-12.23</i> | <i>9.67</i>  | <i>0.16</i> |
|               | 2.222(18)       | -24.214(43)        | 1.387        | -17.08        | -13.07        | 5.93         | 0.31        |
|               | <i>2.126(3)</i> | <i>-18.32(7)</i>   | <i>1.386</i> | <i>-14.88</i> | <i>-13.11</i> | <i>9.67</i>  | <i>0.14</i> |
| F(1B)-C(22B)  | 2.013(27)       | -20.921(146)       | 1.344        | -17.88        | -15.79        | 12.75        | 0.13        |
|               | <i>2.013(5)</i> | <i>-17.185(22)</i> | <i>1.344</i> | <i>-16.44</i> | <i>-14.48</i> | <i>13.74</i> | <i>0.14</i> |
|               | 1.840(35)       | -13.230(164)       | 1.344        | -13.82        | -9.96         | 10.56        | 0.39        |
|               | <i>1.960(7)</i> | <i>-16.537(44)</i> | <i>1.346</i> | <i>-15.71</i> | <i>-14.29</i> | <i>13.47</i> | <i>0.10</i> |
| F(2B)-C(22B)  | 2.038(28)       | -19.803(142)       | 1.346        | -17.02        | -15.91        | 13.12        | 0.07        |
|               | <i>1.925(5)</i> | <i>-14.968(21)</i> | <i>1.345</i> | <i>-14.73</i> | <i>-14.07</i> | <i>13.83</i> | <i>0.05</i> |
|               | 1.867(36)       | -10.769(190)       | 1.348        | -14.04        | -12.05        | 15.32        | 0.17        |
|               | <i>1.842(7)</i> | <i>-12.396(39)</i> | <i>1.362</i> | <i>-13.59</i> | <i>-12.48</i> | <i>13.67</i> | <i>0.09</i> |

|              |                 |                    |              |               |               |              |             |
|--------------|-----------------|--------------------|--------------|---------------|---------------|--------------|-------------|
| F(3B)-C(22B) | 2.132(29)       | -23.752(150)       | 1.343        | -19.11        | -18.72        | 14.08        | 0.02        |
|              | <i>1.868(5)</i> | <i>-11.248(27)</i> | <i>1.340</i> | <i>-14.09</i> | <i>-12.72</i> | <i>15.56</i> | <i>0.11</i> |
|              | 2.030(37)       | -15.249(207)       | 1.330        | -17.21        | -15.25        | 17.21        | 0.13        |
|              | <i>2.028(8)</i> | <i>-18.064(46)</i> | <i>1.332</i> | <i>-16.55</i> | <i>-15.01</i> | <i>13.49</i> | <i>0.10</i> |
| N(1B)-C(1B)  | 2.047(13)       | -17.489(56)        | 1.379        | -15.93        | -14.31        | 12.76        | 0.11        |
|              | <i>2.005(4)</i> | <i>-14.166(17)</i> | <i>1.379</i> | <i>-14.05</i> | <i>-12.30</i> | <i>12.18</i> | <i>0.14</i> |
|              | 2.160(39)       | -21.316(179)       | 1.379        | -17.33        | -15.11        | 11.12        | 0.15        |
|              | <i>2.046(3)</i> | <i>-14.731(11)</i> | <i>1.379</i> | <i>-13.92</i> | <i>-12.49</i> | <i>11.68</i> | <i>0.11</i> |
| N(1B)-C(2B)  | 2.192(10)       | -21.253(43)        | 1.368        | -16.59        | -14.40        | 9.74         | 0.15        |
|              | <i>2.145(4)</i> | <i>-18.019(19)</i> | <i>1.367</i> | <i>-15.80</i> | <i>-12.97</i> | <i>10.75</i> | <i>0.22</i> |
|              | 2.246(35)       | -25.167(159)       | 1.367        | -18.97        | -14.81        | 8.61         | 0.28        |
|              | <i>2.127(4)</i> | <i>-17.766(14)</i> | <i>1.365</i> | <i>-15.83</i> | <i>-13.02</i> | <i>11.08</i> | <i>0.22</i> |
| N(2B)-C(2B)  | 2.413(15)       | -22.931(54)        | 1.332        | -18.88        | -16.60        | 12.55        | 0.14        |
|              | <i>2.395(5)</i> | <i>-21.173(22)</i> | <i>1.332</i> | <i>-17.99</i> | <i>-16.20</i> | <i>13.02</i> | <i>0.11</i> |
|              | 2.429(41)       | -25.366(170)       | 1.329        | -20.75        | -16.56        | 11.95        | 0.25        |
|              | <i>2.415(4)</i> | <i>-20.918(16)</i> | <i>1.329</i> | <i>-18.66</i> | <i>-15.80</i> | <i>13.54</i> | <i>0.18</i> |
| N(2B)-C(3B)  | 2.147(16)       | -16.453(62)        | 1.381        | -16.71        | -15.07        | 15.32        | 0.11        |
|              | <i>2.097(3)</i> | <i>-14.586(12)</i> | <i>1.381</i> | <i>-14.89</i> | <i>-13.28</i> | <i>13.59</i> | <i>0.12</i> |
|              | 2.144(19)       | -17.694(65)        | 1.382        | -15.30        | -13.51        | 11.12        | 0.13        |
|              | <i>2.101(3)</i> | <i>-14.14(11)</i>  | <i>1.381</i> | <i>-14.71</i> | <i>-13.60</i> | <i>14.17</i> | <i>0.08</i> |
| C(1B)-C(3B)  | 2.221(18)       | -20.887(52)        | 1.383        | -17.54        | -14.17        | 10.82        | 0.24        |
|              | <i>2.134(5)</i> | <i>-18.073(14)</i> | <i>1.383</i> | <i>-15.45</i> | <i>-12.62</i> | <i>9.99</i>  | <i>0.22</i> |
|              | 2.199(35)       | -21.219(89)        | 1.383        | -16.47        | -13.17        | 8.43         | 0.25        |
|              | <i>2.139(3)</i> | <i>-17.666(9)</i>  | <i>1.383</i> | <i>-15.25</i> | <i>-12.27</i> | <i>9.85</i>  | <i>0.24</i> |
| C(1B)-C(15B) | 1.997(15)       | -16.677(41)        | 1.430        | -15.41        | -13.02        | 11.75        | 0.18        |
|              | <i>1.907(4)</i> | <i>-13.99(11)</i>  | <i>1.429</i> | <i>-13.05</i> | <i>-11.92</i> | <i>10.98</i> | <i>0.09</i> |
|              | 1.928(30)       | -14.713(70)        | 1.433        | -14.04        | -11.77        | 11.10        | 0.19        |
|              | <i>1.919(3)</i> | <i>-14.256(8)</i>  | <i>1.432</i> | <i>-13.29</i> | <i>-11.47</i> | <i>10.51</i> | <i>0.16</i> |
|              | 1.900(21)       | -14.367(57)        | 1.466        | -14.45        | -11.85        | 11.93        | 0.22        |
|              | <i>1.814(3)</i> | <i>-13.007(9)</i>  | <i>1.466</i> | <i>-12.68</i> | <i>-11.18</i> | <i>10.85</i> | <i>0.13</i> |

|              |                 |                   |              |               |               |              |             |
|--------------|-----------------|-------------------|--------------|---------------|---------------|--------------|-------------|
| C(2B)-C(16B) | 1.832(33)       | -14.068(93)       | 1.466        | -14.09        | -11.78        | 11.80        | 0.20        |
|              | <i>1.861(3)</i> | <i>-13.992(7)</i> | <i>1.466</i> | <i>-13.09</i> | <i>-11.53</i> | <i>10.62</i> | <i>0.14</i> |
| C(3B)-C(4B)  | 1.991(15)       | -17.04(42)        | 1.435        | -15.52        | -12.90        | 11.37        | 0.20        |
|              | <i>1.923(3)</i> | <i>-15.039(8)</i> | <i>1.435</i> | <i>-13.74</i> | <i>-11.52</i> | <i>10.22</i> | <i>0.19</i> |
|              | 1.988(19)       | -18.243(49)       | 1.437        | -15.14        | -11.93        | 8.83         | 0.27        |
|              | <i>1.908(3)</i> | <i>-14.348(7)</i> | <i>1.437</i> | <i>-13.43</i> | <i>-11.61</i> | <i>10.69</i> | <i>0.16</i> |
| C(4B)-C(5B)  | 2.082(13)       | -18.189(34)       | 1.410        | -15.95        | -13.34        | 11.10        | 0.20        |
|              | <i>1.991(3)</i> | <i>-15.718(7)</i> | <i>1.410</i> | <i>-13.88</i> | <i>-11.98</i> | <i>10.14</i> | <i>0.16</i> |
|              | 2.190(26)       | -22.288(62)       | 1.407        | -17.68        | -13.66        | 9.06         | 0.29        |
|              | <i>1.979(2)</i> | <i>-14.971(6)</i> | <i>1.406</i> | <i>-13.84</i> | <i>-11.41</i> | <i>10.28</i> | <i>0.21</i> |
| C(4B)-C(9B)  | 2.022(15)       | -15.871(41)       | 1.422        | -15.62        | -12.61        | 12.36        | 0.24        |
|              | <i>1.964(3)</i> | <i>-14.534(8)</i> | <i>1.421</i> | <i>-13.62</i> | <i>-11.75</i> | <i>10.85</i> | <i>0.16</i> |
|              | 2.014(24)       | -17.499(61)       | 1.425        | -14.48        | -12.87        | 9.85         | 0.13        |
|              | <i>1.950(3)</i> | <i>-14.088(8)</i> | <i>1.425</i> | <i>-13.39</i> | <i>-11.78</i> | <i>11.08</i> | <i>0.14</i> |
| C(5B)-C(6B)  | 2.252(13)       | -21.521(34)       | 1.381        | -17.32        | -14.03        | 9.84         | 0.23        |
|              | <i>2.124(2)</i> | <i>-18.586(7)</i> | <i>1.381</i> | <i>-15.11</i> | <i>-12.74</i> | <i>9.26</i>  | <i>0.19</i> |
|              | 2.119(28)       | -18.765(66)       | 1.384        | -15.72        | -12.45        | 9.40         | 0.26        |
|              | <i>2.112(2)</i> | <i>-17.628(6)</i> | <i>1.386</i> | <i>-14.56</i> | <i>-12.49</i> | <i>9.42</i>  | <i>0.17</i> |
| C(6B)-C(7B)  | 2.156(12)       | -19.756(32)       | 1.403        | -16.23        | -13.65        | 10.12        | 0.19        |
|              | <i>2.033(3)</i> | <i>-16.373(7)</i> | <i>1.404</i> | <i>-14.11</i> | <i>-12.00</i> | <i>9.74</i>  | <i>0.18</i> |
|              | 2.127(35)       | -24.304(126)      | 1.412        | -16.08        | -13.32        | 5.10         | 0.21        |
|              | <i>2.021(2)</i> | <i>-15.896(6)</i> | <i>1.404</i> | <i>-13.60</i> | <i>-12.03</i> | <i>9.74</i>  | <i>0.13</i> |
| C(7B)-C(8B)  | 2.236(13)       | -21.058(34)       | 1.384        | -16.76        | -13.95        | 9.65         | 0.20        |
|              | <i>2.132(3)</i> | <i>-18.857(7)</i> | <i>1.383</i> | <i>-14.99</i> | <i>-13.03</i> | <i>9.16</i>  | <i>0.15</i> |
|              | 2.160(40)       | -15.005(208)      | 1.381        | -18.87        | -13.75        | 17.61        | 0.37        |
|              | <i>2.092(2)</i> | <i>-16.944(5)</i> | <i>1.379</i> | <i>-14.32</i> | <i>-12.06</i> | <i>9.44</i>  | <i>0.19</i> |
| C(8B)-C(9B)  | 2.088(13)       | -18.196(33)       | 1.411        | -16.10        | -13.25        | 11.15        | 0.22        |
|              | <i>2.023(3)</i> | <i>-16.272(7)</i> | <i>1.411</i> | <i>-14.26</i> | <i>-12.22</i> | <i>10.21</i> | <i>0.17</i> |
|              | 2.034(25)       | -17.412(55)       | 1.410        | -15.47        | -11.92        | 9.98         | 0.30        |
|              | <i>2.024(2)</i> | <i>-15.634(7)</i> | <i>1.409</i> | <i>-13.95</i> | <i>-12.17</i> | <i>10.48</i> | <i>0.15</i> |

|               |                 |                   |              |               |               |              |             |
|---------------|-----------------|-------------------|--------------|---------------|---------------|--------------|-------------|
| C(9B)-C(10B)  | 1.879(15)       | -13.26(37)        | 1.467        | -14.15        | -11.83        | 12.71        | 0.20        |
|               | <i>1.771(3)</i> | <i>-10.743(7)</i> | <i>1.466</i> | <i>-12.00</i> | <i>-10.15</i> | <i>11.41</i> | <i>0.18</i> |
|               | 1.746(23)       | -12.297(69)       | 1.469        | -11.49        | -9.59         | 8.78         | 0.20        |
|               | <i>1.750(3)</i> | <i>-10.551(7)</i> | <i>1.467</i> | <i>-11.81</i> | <i>-10.19</i> | <i>11.45</i> | <i>0.16</i> |
| C(10B)-C(11B) | 2.142(13)       | -17.963(32)       | 1.413        | -16.31        | -13.29        | 11.64        | 0.23        |
|               | <i>2.006(2)</i> | <i>-15.65(7)</i>  | <i>1.413</i> | <i>-14.10</i> | <i>-11.91</i> | <i>10.36</i> | <i>0.18</i> |
|               | 2.079(26)       | -20.305(60)       | 1.409        | -16.66        | -12.72        | 9.07         | 0.31        |
|               | <i>2.018(3)</i> | <i>-16.301(7)</i> | <i>1.414</i> | <i>-14.21</i> | <i>-12.28</i> | <i>10.18</i> | <i>0.16</i> |
| C(10B)-C(15B) | 2.057(16)       | -16.771(43)       | 1.420        | -15.73        | -13.41        | 12.37        | 0.17        |
|               | <i>1.966(3)</i> | <i>-14.337(8)</i> | <i>1.420</i> | <i>-13.42</i> | <i>-11.90</i> | <i>10.98</i> | <i>0.13</i> |
|               | 2.059(24)       | -17.927(60)       | 1.422        | -16.14        | -12.09        | 10.31        | 0.34        |
|               | <i>1.938(3)</i> | <i>-13.662(8)</i> | <i>1.419</i> | <i>-13.25</i> | <i>-11.47</i> | <i>11.06</i> | <i>0.16</i> |
| C(11B)-C(12B) | 2.201(12)       | -20.455(33)       | 1.384        | -16.50        | -13.66        | 9.70         | 0.21        |
|               | <i>2.119(2)</i> | <i>-17.699(6)</i> | <i>1.384</i> | <i>-14.84</i> | <i>-12.40</i> | <i>9.54</i>  | <i>0.20</i> |
|               | 2.330(33)       | -25.124(92)       | 1.397        | -18.89        | -15.85        | 9.61         | 0.19        |
|               | <i>2.087(2)</i> | <i>-18.113(6)</i> | <i>1.387</i> | <i>-14.60</i> | <i>-12.52</i> | <i>9.00</i>  | <i>0.17</i> |
| C(12B)-C(13B) | 2.125(12)       | -18.933(32)       | 1.402        | -15.82        | -13.24        | 10.12        | 0.19        |
|               | <i>2.037(2)</i> | <i>-16.008(6)</i> | <i>1.402</i> | <i>-13.86</i> | <i>-12.12</i> | <i>9.97</i>  | <i>0.14</i> |
|               | 2.058(33)       | -20.621(91)       | 1.412        | -16.48        | -12.42        | 8.29         | 0.33        |
|               | <i>2.021(2)</i> | <i>-16.192(6)</i> | <i>1.405</i> | <i>-13.69</i> | <i>-12.20</i> | <i>9.70</i>  | <i>0.12</i> |
| C(13B)-C(14B) | 2.234(12)       | -21.238(32)       | 1.379        | -16.99        | -14.01        | 9.76         | 0.21        |
|               | <i>2.133(2)</i> | <i>-18.333(7)</i> | <i>1.380</i> | <i>-14.88</i> | <i>-12.84</i> | <i>9.39</i>  | <i>0.16</i> |
|               | 2.196(30)       | -20.818(76)       | 1.383        | -16.47        | -13.22        | 8.87         | 0.25        |
|               | <i>2.108(2)</i> | <i>-17.238(6)</i> | <i>1.382</i> | <i>-14.40</i> | <i>-12.35</i> | <i>9.51</i>  | <i>0.17</i> |
| C(14B)-C(15B) | 2.085(13)       | -17.9(33)         | 1.406        | -15.71        | -13.25        | 11.07        | 0.19        |
|               | <i>1.995(3)</i> | <i>-15.417(7)</i> | <i>1.406</i> | <i>-13.75</i> | <i>-11.98</i> | <i>10.32</i> | <i>0.15</i> |
|               | 2.049(24)       | -16.8(58)         | 1.412        | -15.38        | -11.64        | 10.22        | 0.32        |
|               | <i>2.011(2)</i> | <i>-15.381(6)</i> | <i>1.411</i> | <i>-13.68</i> | <i>-12.07</i> | <i>10.37</i> | <i>0.13</i> |
|               | 2.114(22)       | -16.373(57)       | 1.404        | -16.17        | -13.33        | 13.13        | 0.21        |
|               | <i>2.029(3)</i> | <i>-15.712(9)</i> | <i>1.403</i> | <i>-13.96</i> | <i>-12.16</i> | <i>10.41</i> | <i>0.15</i> |

|               |                 |                   |              |               |               |              |             |
|---------------|-----------------|-------------------|--------------|---------------|---------------|--------------|-------------|
| C(16B)-C(17B) | 2.111(31)       | -19.198(69)       | 1.400        | -16.21        | -12.64        | 9.66         | 0.28        |
|               | <i>2.038(3)</i> | <i>-15.964(7)</i> | <i>1.399</i> | <i>-13.88</i> | <i>-12.20</i> | <i>10.12</i> | <i>0.14</i> |
| C(16B)-C(21B) | 2.139(21)       | -17.241(58)       | 1.400        | -16.32        | -13.87        | 12.95        | 0.18        |
|               | <i>2.039(3)</i> | <i>-16.458(9)</i> | <i>1.400</i> | <i>-14.47</i> | <i>-12.21</i> | <i>10.22</i> | <i>0.18</i> |
|               | 2.118(33)       | -19.539(81)       | 1.401        | -15.87        | -13.26        | 9.59         | 0.20        |
|               | <i>2.030(3)</i> | <i>-15.892(7)</i> | <i>1.401</i> | <i>-14.02</i> | <i>-12.09</i> | <i>10.22</i> | <i>0.16</i> |
| C(17B)-C(18B) | 2.177(13)       | -20.697(37)       | 1.390        | -16.72        | -13.94        | 9.97         | 0.20        |
|               | <i>2.033(3)</i> | <i>-15.952(7)</i> | <i>1.390</i> | <i>-13.95</i> | <i>-11.85</i> | <i>9.85</i>  | <i>0.18</i> |
|               | 2.195(17)       | -23.529(41)       | 1.390        | -16.29        | -13.08        | 5.84         | 0.25        |
|               | <i>2.059(2)</i> | <i>-16.519(6)</i> | <i>1.391</i> | <i>-14.40</i> | <i>-12.05</i> | <i>9.94</i>  | <i>0.19</i> |
| C(18B)-C(19B) | 2.182(21)       | -17.876(59)       | 1.395        | -17.30        | -13.49        | 12.91        | 0.28        |
|               | <i>2.067(3)</i> | <i>-17.582(7)</i> | <i>1.395</i> | <i>-14.39</i> | <i>-12.35</i> | <i>9.16</i>  | <i>0.17</i> |
|               | 2.158(42)       | -19.076(90)       | 1.390        | -16.26        | -13.59        | 10.78        | 0.20        |
|               | <i>2.056(2)</i> | <i>-17.084(6)</i> | <i>1.390</i> | <i>-14.60</i> | <i>-11.94</i> | <i>9.46</i>  | <i>0.22</i> |
| C(19B)-C(20B) | 2.187(21)       | -17.941(60)       | 1.391        | -17.02        | -13.72        | 12.79        | 0.24        |
|               | <i>2.097(3)</i> | <i>-17.39(7)</i>  | <i>1.391</i> | <i>-14.64</i> | <i>-12.15</i> | <i>9.40</i>  | <i>0.21</i> |
|               | 2.074(40)       | -17.48(70)        | 1.394        | -15.54        | -12.76        | 10.82        | 0.22        |
|               | <i>2.058(2)</i> | <i>-17.167(6)</i> | <i>1.394</i> | <i>-14.30</i> | <i>-12.28</i> | <i>9.42</i>  | <i>0.16</i> |
| C(19B)-C(22B) | 1.842(19)       | -12.298(56)       | 1.502        | -13.63        | -12.95        | 14.28        | 0.05        |
|               | <i>1.792(3)</i> | <i>-13.513(7)</i> | <i>1.502</i> | <i>-12.14</i> | <i>-11.52</i> | <i>10.16</i> | <i>0.05</i> |
|               | 1.813(43)       | -11.206(96)       | 1.500        | -13.06        | -12.04        | 13.89        | 0.08        |
|               | <i>1.793(5)</i> | <i>-12.251(8)</i> | <i>1.498</i> | <i>-12.51</i> | <i>-11.14</i> | <i>11.40</i> | <i>0.12</i> |
| C(20B)-C(21B) | 2.205(13)       | -19.822(37)       | 1.390        | -16.82        | -13.49        | 10.49        | 0.25        |
|               | <i>2.070(3)</i> | <i>-17.018(7)</i> | <i>1.390</i> | <i>-14.26</i> | <i>-12.45</i> | <i>9.69</i>  | <i>0.14</i> |
|               | 2.172(17)       | -22.849(40)       | 1.391        | -15.95        | -13.13        | 6.23         | 0.21        |
|               | <i>2.065(2)</i> | <i>-16.612(6)</i> | <i>1.392</i> | <i>-14.36</i> | <i>-12.26</i> | <i>10.00</i> | <i>0.17</i> |

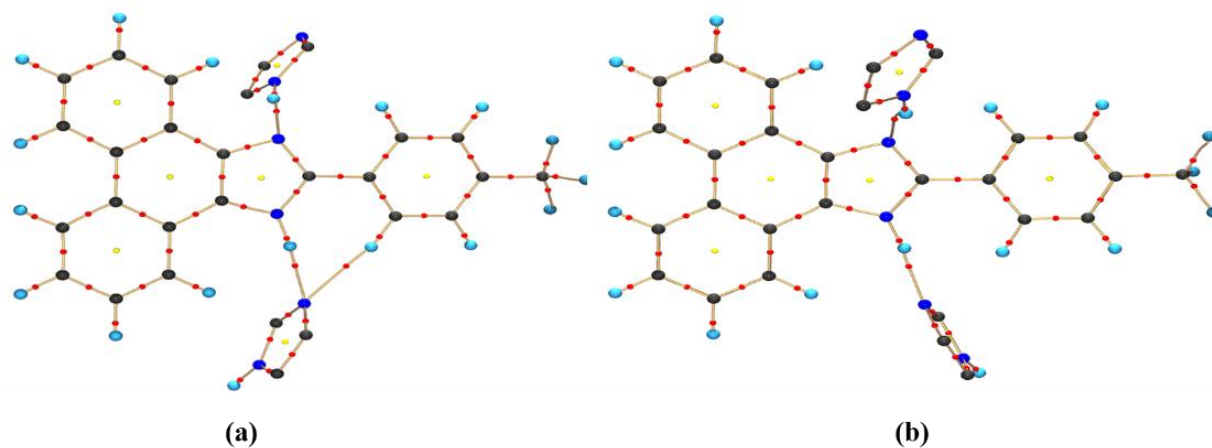

**Figure S21:** Bond critical points (BCPs) (red spheres), ring critical points (RCPs) (yellow spheres), and bond paths (BPs) (golden line) for the covalent and intermolecular hydrogen bonding in (a) 1P\_T and (b) 1P\_O polymorphic forms, plotted based on the experimental multipole model.

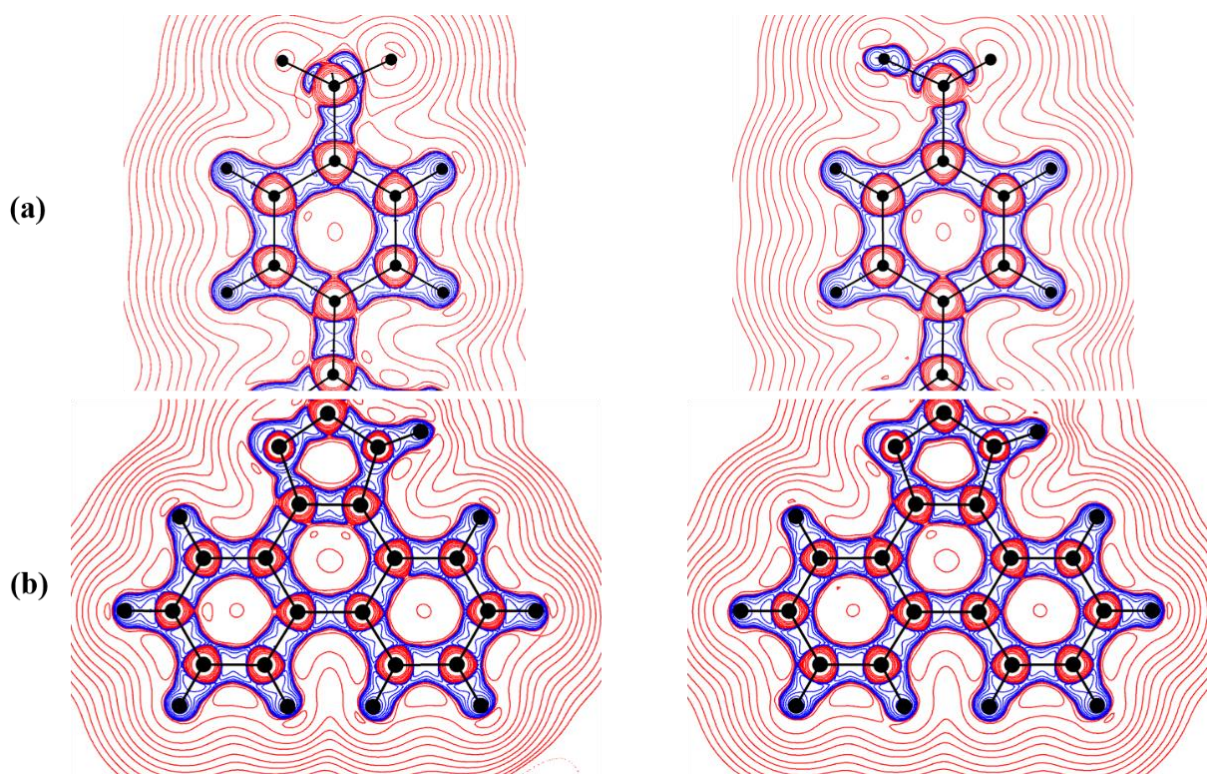

**Figure S22:** Laplacian maps (experimental) for 1P\_T drawn in the plane containing atoms (a) C7, C12, and C2, and (b) C21, C17, and C22 for molecule A (left) and molecule B (right). Contours of Laplacian drawn at a logarithmic interval of  $-\nabla^2\rho_b e \text{ \AA}^{-5}$ . Blue and red solid lines represent negative and positive contours, respectively.

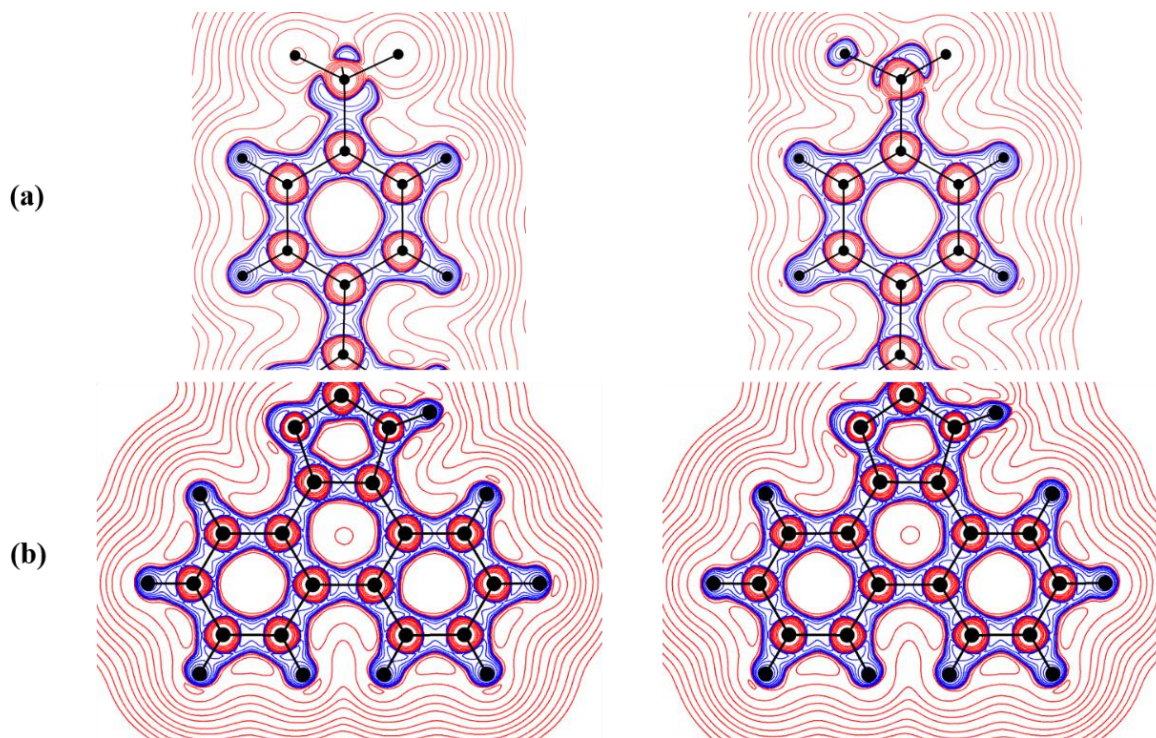

**Figure S23:** Laplacian maps (theoretical) for 1P\_T drawn in the plane containing atoms (a) C7, C12, C2, and (b) C21, C17, C22 for molecule A (left) and molecule B (right).

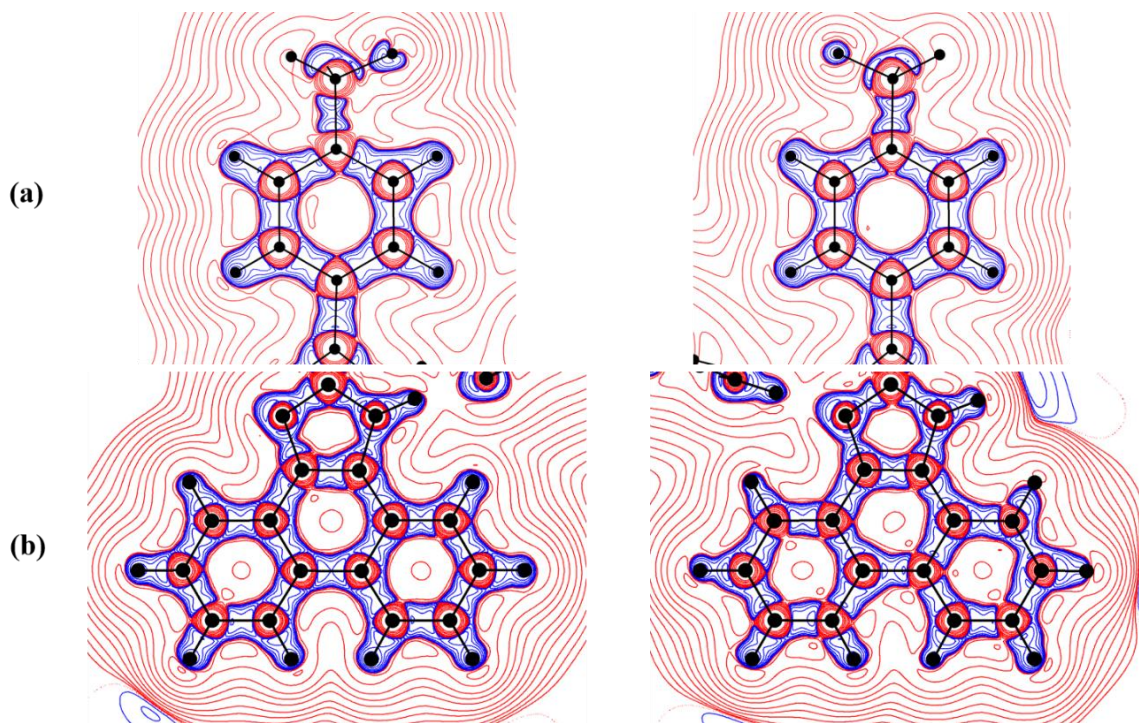

**Figure S24:** Laplacian maps (experimental) for 1P\_O drawn in the plane containing atoms (a) C7, C12, and C2, and (b) C21, C17, and C22 for molecule A (left) and molecule B (right).

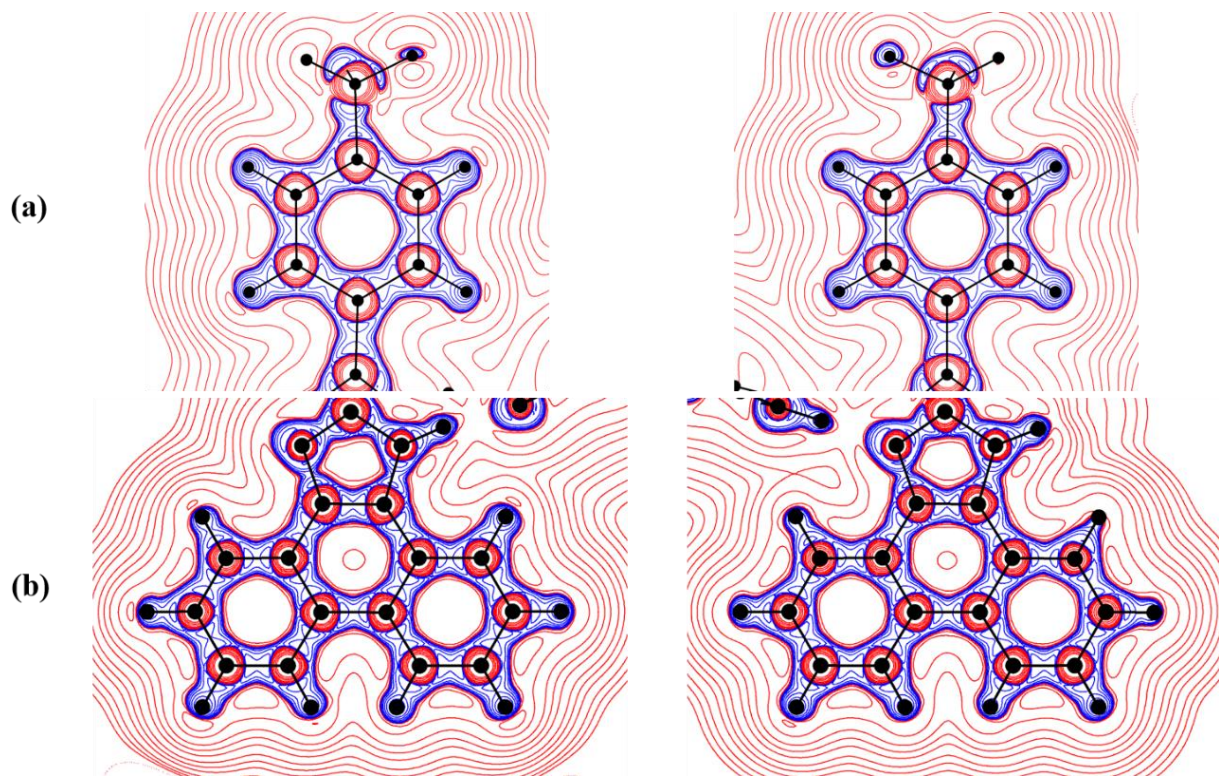

**Figure S25:** Laplacian maps (theoretical) for 1P\_O drawn in the plane containing atoms (a) C7, C12, and C2, and (b) C21, C17, and C22 for molecule A (left) and molecule B (right).

**Table S4:** Topological parameters of the bonds involved in the proton tautomeric pathways in the polymorphic forms 1P\_T (first row) and 1P\_O (second row).

| Bonds     | $\rho$ ( $e\text{\AA}^{-3}$ ) |              | $\nabla^2\rho$ ( $e\text{\AA}^{-5}$ ) |              | $R_{ij}$ ( $\text{\AA}$ ) |              | $\varepsilon$ |              | $G_{cp}$ (r) ( $\text{kJ mol}^{-1} \text{\AA}^{-3}$ ) |              | $V_{cp}$ (r) ( $\text{kJ mol}^{-1} \text{\AA}^{-3}$ ) |              |
|-----------|-------------------------------|--------------|---------------------------------------|--------------|---------------------------|--------------|---------------|--------------|-------------------------------------------------------|--------------|-------------------------------------------------------|--------------|
|           | <i>Exp.</i>                   | <i>Theo.</i> | <i>Exp.</i>                           | <i>Theo.</i> | <i>Exp.</i>               | <i>Theo.</i> | <i>Exp.</i>   | <i>Theo.</i> | <i>Exp.</i>                                           | <i>Theo.</i> | <i>Exp.</i>                                           | <i>Theo.</i> |
| N1A-C1A   | 2.105                         | 2.052        | -19.255                               | -15.351      | 1.375                     | 1.374        | 0.16          | 0.13         | 4935.94                                               | 5119.73      | -13416.31                                             | -13048.74    |
|           | 1.960                         | 2.034        | -17.232                               | -15.228      | 1.377                     | 1.379        | 0.05          | 0.15         | 4358.33                                               | 5040.96      | -11893.52                                             | -12864.95    |
| N1A-C2A   | 2.201                         | 2.129        | -21.181                               | -18.270      | 1.366                     | 1.367        | 0.29          | 0.21         | 5277.26                                               | 5198.49      | -14413.99                                             | -13757.62    |
|           | 2.195                         | 2.147        | -23.753                               | -19.192      | 1.363                     | 1.364        | 0.30          | 0.14         | 4909.69                                               | 5198.49      | -14203.96                                             | -13915.15    |
| N2A-C2A   | 2.491                         | 2.361        | -23.418                               | -20.975      | 1.334                     | 1.334        | 0.16          | 0.12         | 6800.05                                               | 6274.95      | -17905.91                                             | -16383.12    |
|           | 2.451                         | 2.325        | -25.126                               | -20.758      | 1.334                     | 1.334        | 0.19          | 0.14         | 6327.46                                               | 6064.91      | -17275.79                                             | -15963.04    |
| N1A-H1A   | 2.097                         | 2.136        | -32.392                               | -26.682      | 1.034                     | 1.034        | 0.06          | 0.07         | 3281.88                                               | 4200.80      | -12523.64                                             | -13311.29    |
|           | 2.105                         | 2.070        | -33.105                               | -25.440      | 1.035                     | 1.034        | 0.04          | 0.06         | 3229.37                                               | 3990.76      | -12576.15                                             | -12628.66    |
| N1B-C1B   | 2.047                         | 2.005        | -17.489                               | -14.166      | 1.379                     | 1.379        | 0.11          | 0.14         | 4830.92                                               | 4988.45      | -12864.95                                             | -12576.15    |
|           | 2.160                         | 2.046        | -21.316                               | -14.731      | 1.379                     | 1.379        | 0.15          | 0.11         | 5014.71                                               | 5145.98      | -13915.15                                             | -13022.48    |
| N1B-C2B   | 2.192                         | 2.145        | -21.253                               | -18.019      | 1.368                     | 1.367        | 0.15          | 0.22         | 5198.49                                               | 5329.77      | -14308.98                                             | -13967.66    |
|           | 2.246                         | 2.127        | -25.167                               | -17.766      | 1.367                     | 1.365        | 0.28          | 0.22         | 5040.96                                               | 5251.00      | -14729.06                                             | -13757.62    |
| N2B-C2B   | 2.413                         | 2.395        | -22.931                               | -21.173      | 1.332                     | 1.332        | 0.14          | 0.11         | 6353.71                                               | 6458.73      | -16908.22                                             | -16803.20    |
|           | 2.429                         | 2.415        | -25.366                               | -20.918      | 1.329                     | 1.329        | 0.25          | 0.18         | 6169.93                                               | 6616.26      | -16986.99                                             | -17065.75    |
| N1B-H1B   | 2.166                         | 2.082        | -33.751                               | -27.127      | 1.040                     | 1.039        | 0.06          | 0.08         | 3518.17                                               | 3833.23      | -13232.52                                             | -12654.91    |
|           | 2.172                         | 2.080        | -33.610                               | -28.153      | 1.039                     | 1.039        | 0.07          | 0.07         | 3570.68                                               | 3701.96      | -13337.54                                             | -12576.15    |
| H1A...N2B | 0.226                         | 0.262        | 1.843                                 | 2.048        | 1.852                     | 1.854        | 0.05          | 0.07         | 393.83                                                | 472.59       | -472.59                                               | -577.61      |
|           | 0.292                         | 0.318        | 2.303                                 | 2.354        | 1.789                     | 1.785        | 0.06          | 0.06         | 551.36                                                | 603.87       | -682.63                                               | -761.40      |
| H1B...N2A | 0.201                         | 0.237        | 1.530                                 | 1.638        | 1.902                     | 1.901        | 0.03          | 0.01         | 341.32                                                | 393.83       | -393.83                                               | -472.59      |
|           | 0.105                         | 0.212        | 2.561                                 | 1.480        | 1.978                     | 1.950        | 0.18          | 0.04         | 367.57                                                | 341.32       | -262.55                                               | -420.08      |

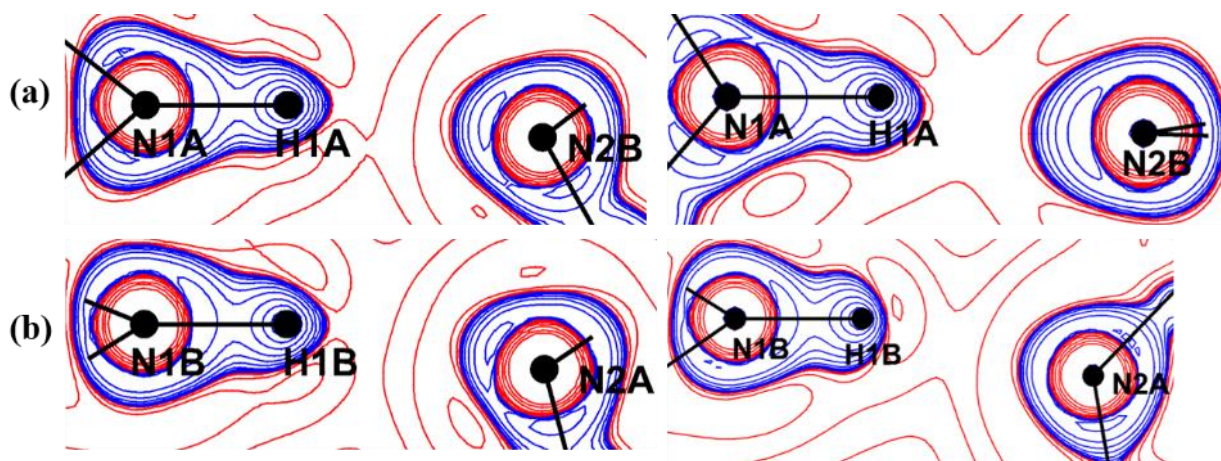

**Figure S26:** Experimental Laplacian maps of N-H...N hydrogen bonds for 1P\_T (left) and 1P\_O (right). Contours of Laplacian drawn at a logarithmic interval of  $-\nabla^2\rho_b \text{ e}\text{\AA}^{-5}$ . Blue and red solid lines represent negative and positive contours, respectively.

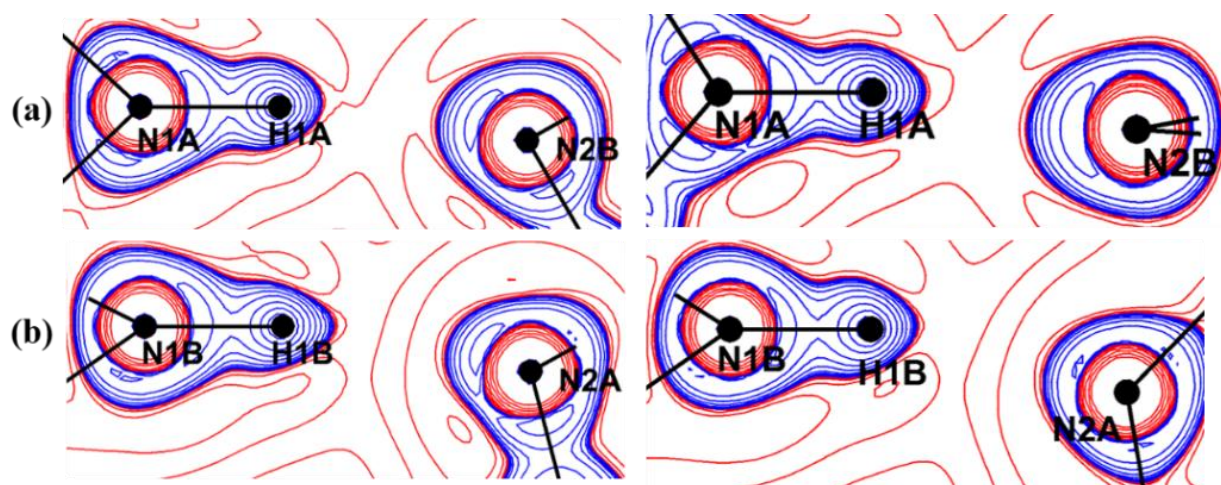

**Figure S27:** Theoretical Laplacian maps of N-H...N interactions for 1P\_T (left) and 1P\_O (right). Contours of Laplacian drawn at a logarithmic interval of  $-\nabla^2\rho_b \text{ e}\text{\AA}^{-5}$ . Blue and red solid lines represent negative and positive contours, respectively.

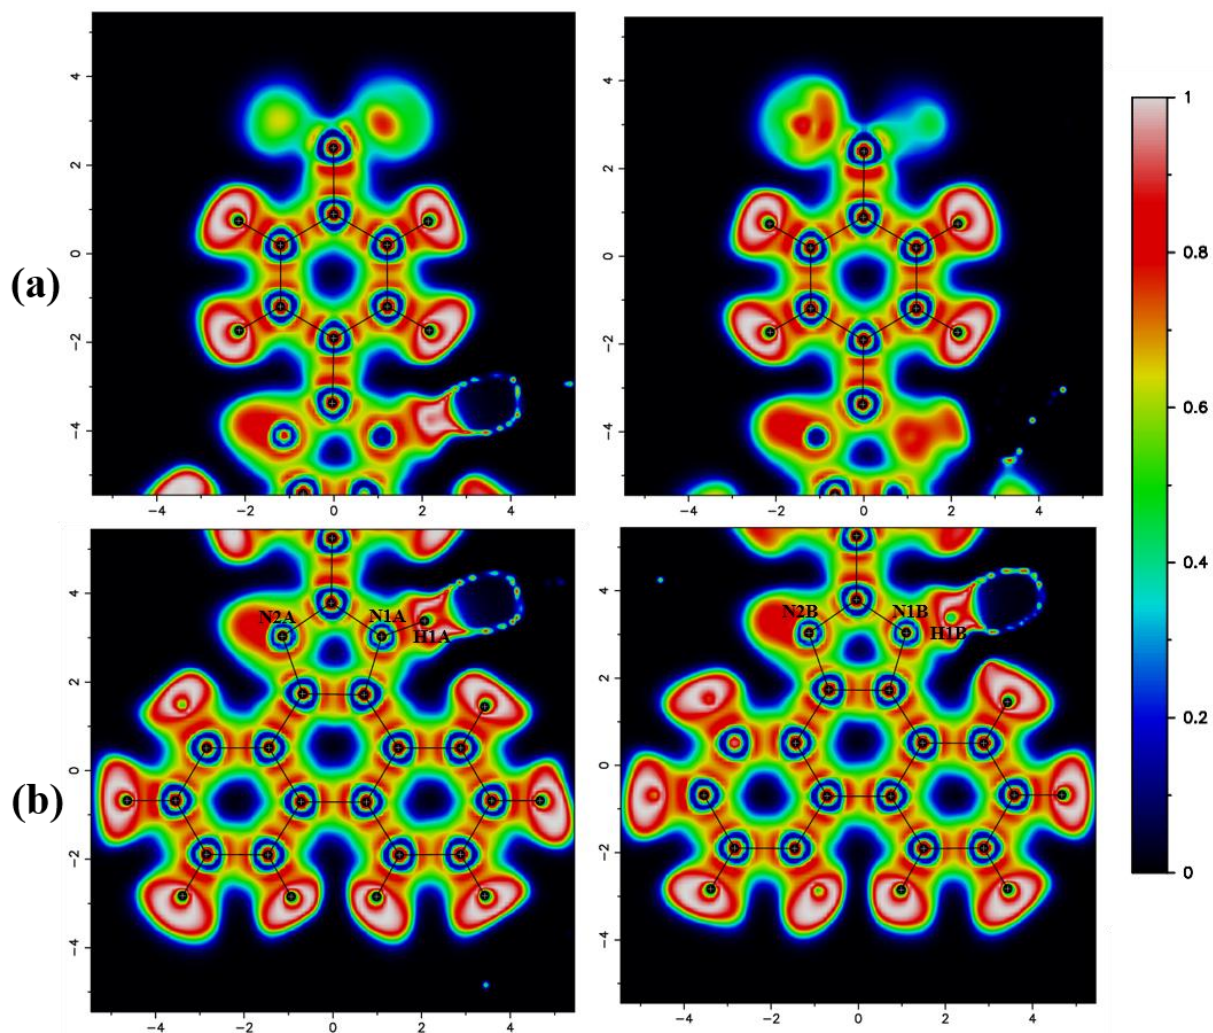

**Figure S28:** Experimental 2D-ELF for molecule A (left) and molecule B (right), drawn in the plane containing atoms (a) C7, C12, and C2, and (b) C21, C17, C22 for 1P\_T form.

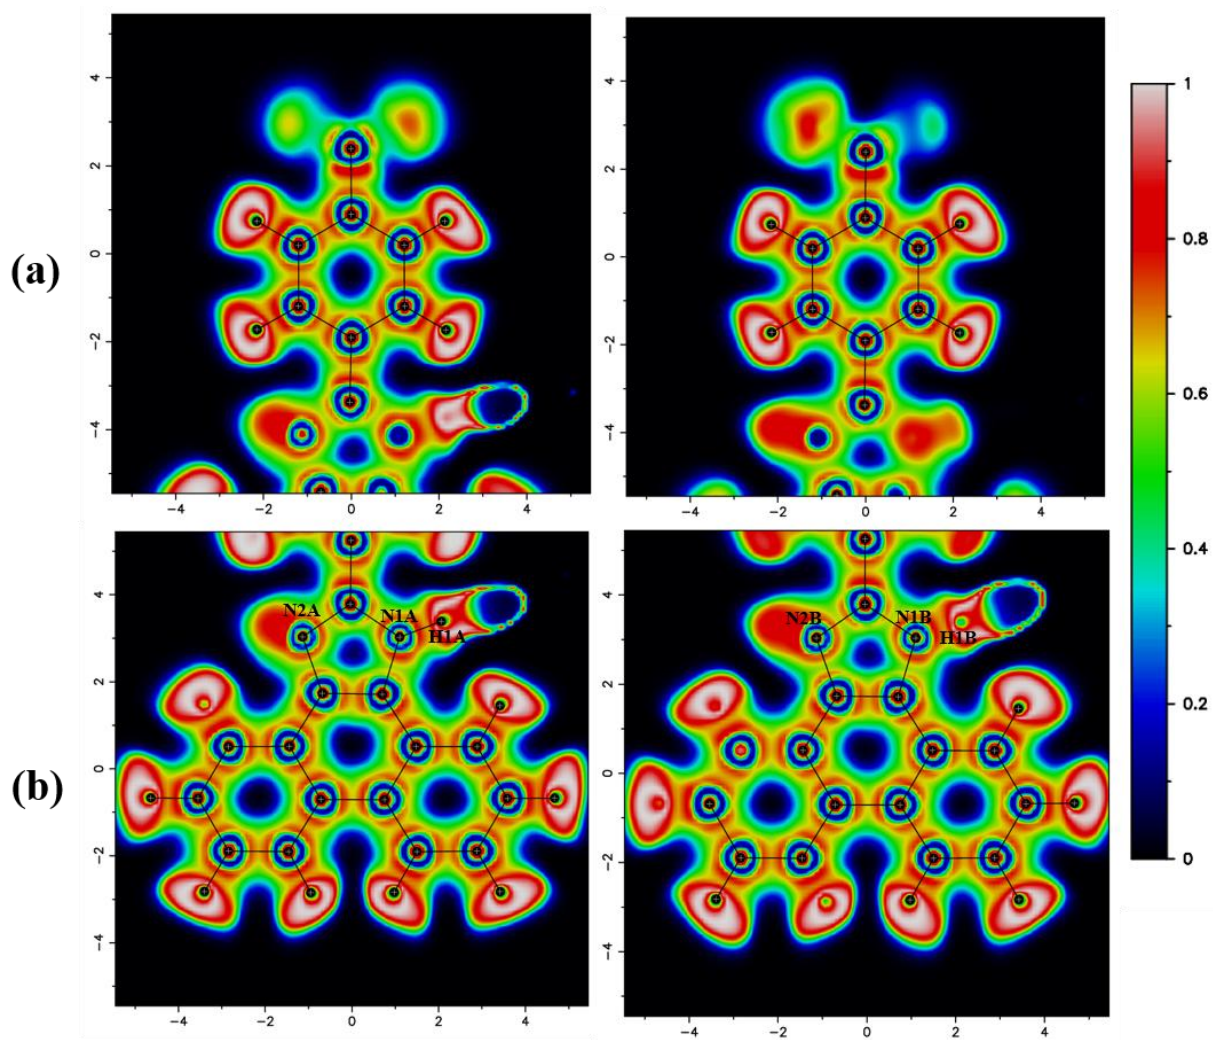

**Figure S29:** Theoretical 2D-ELF for molecule A (left) and molecule B (right), drawn in the plane containing atoms (a) C7, C12, C2, and (b) C21, C17, C22 for 1P\_T form.

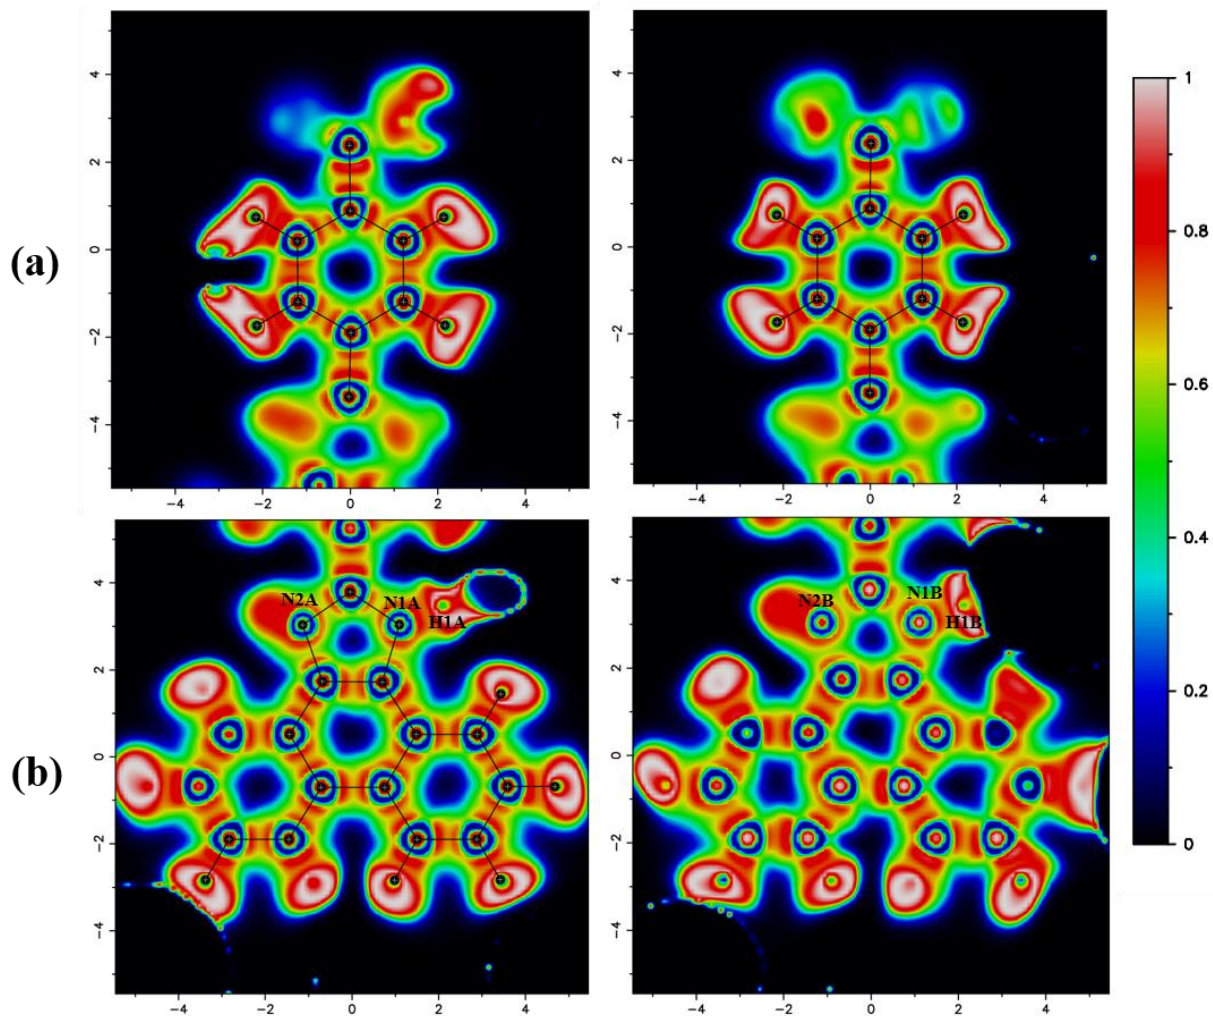

**Figure S30:** Experimental electron localization function for molecule A (left) and molecule B (right), drawn in the plane containing atoms (a) C7, C12, C2, and (b) C21, C17, C22 for 1P\_O form.

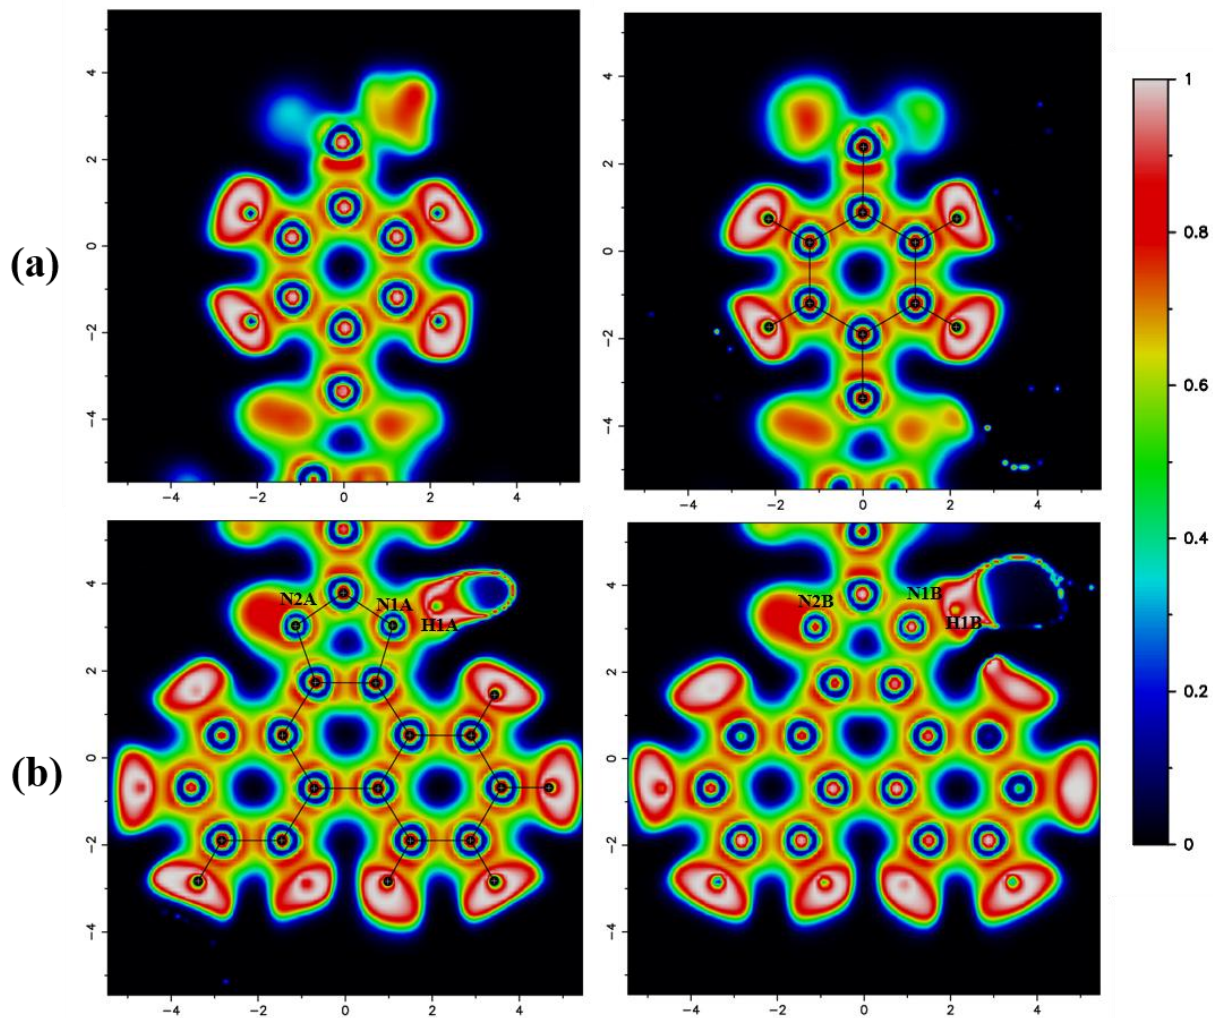

**Figure S31:** Theoretical electron localization function for molecule A (left) and molecule B (right), drawn in the plane containing atoms (a) C7, C12, C2, and (b) C21, C17, C22 for 1P\_O form.

**Table S5:** Experimental and optimized lattice parameters, N-H and N-H...N distances, and N-H...N angles for the polymorphic forms.

| Parameters                 | 1P_T                                           |           |                                               | 1P_O                                                               |                                                |           |                                               |                                                                    |
|----------------------------|------------------------------------------------|-----------|-----------------------------------------------|--------------------------------------------------------------------|------------------------------------------------|-----------|-----------------------------------------------|--------------------------------------------------------------------|
|                            | Pristine Structure<br>(Before Proton Transfer) |           | Modified Structure<br>(After Proton Transfer) | Difference<br>  Optimized<br>(Pristine –<br>Modified)<br>Structure | Pristine Structure<br>(Before Proton Transfer) |           | Modified Structure<br>(After Proton Transfer) | Difference<br>  Optimized<br>(Pristine –<br>Modified)<br>Structure |
|                            | Crystal                                        | Optimized | Optimized                                     |                                                                    | Crystal                                        | Optimized | Optimized                                     |                                                                    |
| $a$ (Å)                    | 14.4058                                        | 14.4086   |                                               | 0                                                                  | 18.6560                                        | 18.4766   |                                               | 0                                                                  |
| $b$ (Å)                    | 14.4058                                        | 14.4085   |                                               | 0                                                                  | 10.2687                                        | 10.2896   |                                               | 0                                                                  |
| $c$ (Å)                    | 15.8555                                        | 15.7561   |                                               | 0                                                                  | 17.9704                                        | 17.9380   |                                               | 0                                                                  |
| N1A-H1A (Å)                | 1.034                                          | 1.048     | -                                             | 0.008                                                              | 1.034                                          | 1.060     | -                                             | 0.007                                                              |
| N2A-H1B (Å)                | -                                              | -         | 1.056                                         |                                                                    | -                                              | -         | 1.053                                         |                                                                    |
| N1A-H1A...N2B (Å)          | 1.852                                          | 1.803     | -                                             | 0.069                                                              | 1.785                                          | 1.717     | -                                             | 0.042                                                              |
| N1A...H1A-N2B (Å)          | -                                              | -         | 1.734                                         |                                                                    | -                                              | -         | 1.675                                         |                                                                    |
| $\angle$ N1A-H1A...N2B (°) | 172.73                                         | 173.84    | -                                             | 8.86                                                               | 172.07                                         | 176.52    | -                                             | 1.22                                                               |
| $\angle$ N1A...H1A-N2B (°) | -                                              | -         | 164.98                                        |                                                                    | -                                              | -         | 177.74                                        |                                                                    |
| N1B-H1B (Å)                | 1.039                                          | 1.045     | -                                             | 0.015                                                              | 1.039                                          | 1.043     | -                                             | 0.024                                                              |
| N2B-H1A (Å)                | -                                              | -         | 1.060                                         |                                                                    | -                                              | -         | 1.067                                         |                                                                    |
| N1B-H1B...N2A (Å)          | 1.899                                          | 1.847     | -                                             | 0.050                                                              | 1.946                                          | 1.879     | -                                             | 0.053                                                              |
| N1B...H1B-N2A (Å)          | -                                              | -         | 1.797                                         |                                                                    | -                                              | -         | 1.826                                         |                                                                    |
| $\angle$ N1B-H1B...N2A (°) | 170.06                                         | 170.01    | -                                             | 11.75                                                              | 166.07                                         | 169.31    | -                                             | 13.08                                                              |
| $\angle$ N1B...H1B-N2A (°) | -                                              | -         | 158.26                                        |                                                                    | -                                              | -         | 156.23                                        |                                                                    |

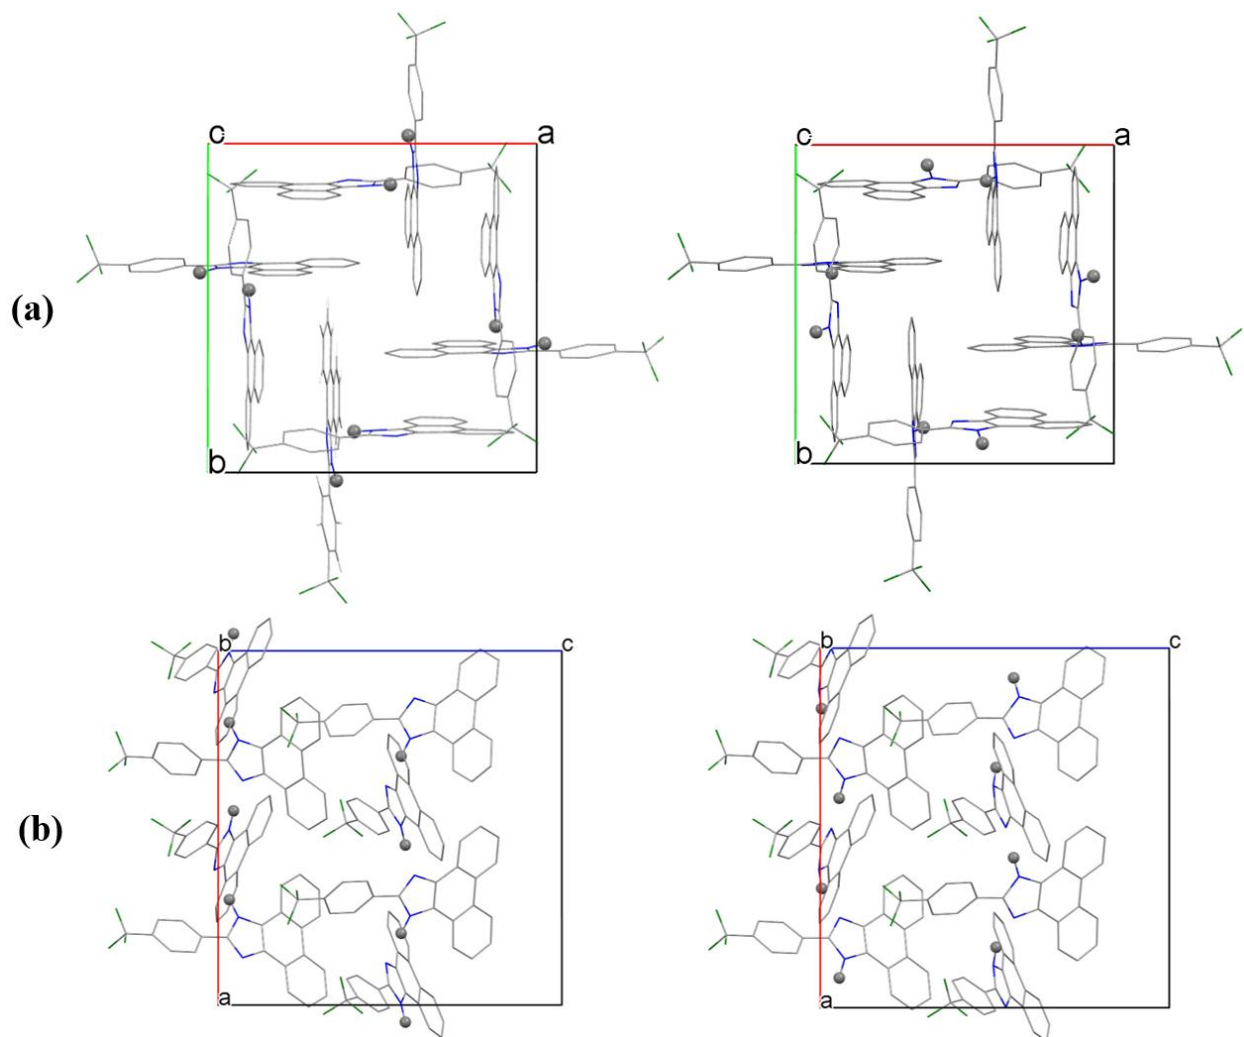

**Figure S32:** Pristine optimized structure (left) and modified structure (right) for (a) 1P\_T and (b) 1P\_O form. Only H-atoms (highlighted in grey) of the -NH groups are shown for clarity.

## Annexure 1

### Optimized coordinates of compound 1

|   |                 |                 |                 |
|---|-----------------|-----------------|-----------------|
| F | -6.644194000000 | -0.088688000000 | 1.303378000000  |
| F | -6.717761000000 | 1.147126000000  | -0.482844000000 |
| F | -6.744351000000 | -1.028912000000 | -0.654507000000 |
| N | 0.357690000000  | -1.137514000000 | -0.017723000000 |
| N | 0.301408000000  | 1.095559000000  | -0.036445000000 |
| C | 4.099892000000  | -0.693520000000 | 0.019893000000  |
| C | -3.986283000000 | 1.189759000000  | 0.097072000000  |
| C | 4.054605000000  | 0.776067000000  | 0.001556000000  |
| C | 2.802830000000  | 1.461466000000  | -0.020369000000 |
| C | 1.671005000000  | -0.720482000000 | -0.006742000000 |
| C | -0.434237000000 | -0.005546000000 | -0.031882000000 |
| C | -1.895907000000 | -0.035134000000 | -0.039385000000 |
| C | 1.606101000000  | 0.668221000000  | -0.021852000000 |
| C | 2.891377000000  | -1.460221000000 | 0.014108000000  |
| C | -2.598195000000 | 1.176000000000  | 0.097278000000  |
| C | 4.149875000000  | -3.536785000000 | 0.050978000000  |
| C | 5.344978000000  | -2.799221000000 | 0.058282000000  |
| C | 5.314042000000  | -1.414317000000 | 0.042704000000  |
| C | -6.201196000000 | 0.006131000000  | 0.026476000000  |
| C | 2.753513000000  | 2.868582000000  | -0.038551000000 |
| C | -4.015679000000 | -1.213728000000 | -0.181702000000 |
| C | -4.699764000000 | -0.005416000000 | -0.039967000000 |
| C | -2.624719000000 | -1.227318000000 | -0.184706000000 |
| C | 2.939247000000  | -2.869795000000 | 0.029025000000  |
| C | 5.223926000000  | 1.570050000000  | 0.004125000000  |
| C | 5.162038000000  | 2.953416000000  | -0.013708000000 |
| C | 3.920066000000  | 3.610665000000  | -0.035232000000 |
| H | -4.523474000000 | 2.126595000000  | 0.196568000000  |
| H | -2.031091000000 | 2.093871000000  | 0.200144000000  |
| H | 4.175849000000  | -4.622050000000 | 0.062199000000  |
| H | 6.300161000000  | -3.315010000000 | 0.075725000000  |
| H | 6.256720000000  | -0.880037000000 | 0.048380000000  |
| H | 1.779637000000  | 3.346500000000  | -0.055378000000 |
| H | -4.572686000000 | -2.136057000000 | -0.302500000000 |
| H | -2.115908000000 | -2.177145000000 | -0.320430000000 |
| H | 2.012241000000  | -3.437529000000 | 0.021445000000  |
| H | 6.200104000000  | 1.099307000000  | 0.020123000000  |
| H | 6.081603000000  | 3.531052000000  | -0.011222000000 |
| H | 3.877805000000  | 4.695652000000  | -0.049409000000 |
| H | 0.037015000000  | -2.090448000000 | 0.034888000000  |
